# Supplementary material for: A chemical probe of CARM1 alters epigenetic plasticity against breast cancer cell invasion
Source: eLife journal article supplement (doi:10.7554/elife.47110), 2019-10-28
Supplement: supp [file elife_poa_e47110_Supplementary_file_1.xlsx]

## Sheet: Table S1
Table S1. IC50 of SAH, SNF, 1, 2a, 2b, 5a and 5b
* Previously reported IC50 values (Zheng, et al., J Am Chem Soc 134, 18004-18014)
IC50/mM	Ligands
Methyltransfereases	SAH	SNF	1	2a	2b	5a	5b
BCDIN3D	0.5	3.4	0.7	3	17	13	46
METTL3-14	2	3.7	5	13	5	>50	22
DNMT1	3.2	10.5	3	7.2	>50 *	>50	>50
DNMT3B	0.21	0.18	5	>50	>50	>50	>50
DNMT3A	0.25	0.36	2	34	>50	>50	28
PRMT7	1.3	1.4	1.3	1.2	5	0.4	>50
PRMT9	25	26	27	6	>50	1	>50
PRMT5	1.1	8.2	1.2	3.7	12	2	>50
PRMT6	0.6	1.5	0.09	43	>50	>50	>50
CARM1	0.6	0.3	0.013	0.03	22 *	0.043	1.91
PRMT3	9.9	28	3.6	2.7	8 *	6	>50
PRMT8	0.5	0.7	0.03	1.3	12	>50	>50
PRMT1	9.6	6.6	0.3	>50	>50	54	>50
DOT1L	3.2	>50	10	31	15	>50	>50
PRDM9	>50	>50	>50	17	>50	>50	>50
SUV39H2	0.6	4.6	25	10.1	>50	>50	37
SUV39H1	4	13	44	39	>50	>50	19
SETDB1	1	8	19	>50	>50	>50	>50
GLP	5	32	>100	>100	>50	>50	>50
G9a	6.7	19	>100	>100	>50	>50	>50
PRC2	8	29	>50	4.7	>50 *	>50	>50
MLL3	18	13	>50	>50	>50	>50	>50
MLL1	8.3	21	>50	2.6	5 *	>50	>50
SETD2	2.9	28	>50	>50	0.5 *	50	28
ASH1L	>50	>50	>50	>50	>50	>50	>50
NSD2	>50	22	>50	>50	>50	>50	>50
NSD3	>50	21	>50	>50	>50	>50	>50
NSD1	>50	23	>50	>50	>50	>50	>50
SETD8	>100	>100	>100	>100	>50	>50	>50
SET7/9	>100	1.1	28	>50	>50	>100	>50
SUV420H1	>50	>50	>50	>50	>50	>50	>50
SUV420H2	>50	>50	>50	>50	>50	>50	>50
SMYD3	10	3	6	12	6	>50	24
SMYD2	24	0.4	0.34	0.3	5	>50	>50

## Sheet: Table S2
Table S2. Direct hydrogen bond interactions of 1 with the residues of CARM1 and their comparison with CARM1-SNF and CARM1-SAH complexes. The variations among the subunits of the CARM1-1 complex (4IKP) were observed for the NZ of Chain A (III and IV) and Q160 in Chain C (´A and ´B). For the CARM1-SNF complex (2Y1W) and the CARM1-SAH complex (2Y1X), there is no significant difference among individu…
	1a				SNF	SAH
	CARM1 (4IKP)				CARM1 (2Y1W)	CARM1 (2Y1X)	PRMT1 (1OR1)	PRMT3 (2FYT)
	Chain A	Chain B	Chain C	Chain D	Chain A, B, C & D	Chain A, B, C & D
NZ (1a) NE (SNF)	III E258/O(2.6) IV Y154/OH(2.9)	E258/O(2.8) E258/OE1(3.7)	E258/O(2.6) E258/OE1(3.2)	E258/O(2.6) E258/OE1(3.2)	E258/O(2.7-3.0) E258/OE1(2.9-3.0)
αN	G193/O (3.4)	G193/O(2.9)	G193/O(3.2)	G193/O(2.9)	G193/O(2.9-3.0)	G193/O(2.8-2.9)	G78/O(3.0)	G280/O(2.9)
O	R169/NH1(2.8) R169/NH2(3.6)	R169/NH1(2.7) R169/NH2(3.2)	R169/NH1(3.0) R169/NH2(3.5)	R169/NH1(2.8) R169/NH2(3.4)	R169/NH1(2.8-2.9) R169/NH2(3.3-3.5)	R169/NH1(2.8-2.9) R169/NH2(3.4-3.5)	R54/NH1(2.7) R54/NH2(3.0)	R256/NH1(2.8) R256/NH2(3.7)
OXT	Q160/NE2(3.2)	R169/NH2(2.7)	Q160/NE2´B(3.1)Q160/OG´A(3.0) Q160/OG´B(3.0)	R169/NH2(2.7)	R169/NH2(2.7-3.1)	R169/NH2(2.8-3.0)	R54/NH2(3.1)	R256/NH2(3.1)
2'OH	E215/OE2(2.8)	E215/OE2(2.6)	E215/OE2(2.7)	E215/OE2(2.7)	E215/OE2(2.6-2.9)	E215/OE2(2.7-2.8)	E100/OE2(2.7)	D302/OD1(2.8)
3'OH	E215/OE1(3.1) E215/OE2(3.1)	E215/OE1(2.8) E215/OE2(3.1) Q160/NE2(3.2)	E215/OE1(3.1) E215/OE2(3.2) Q160/NE2´A(3.5)	E215/OE1(2.8) E215/OE2(3.1) Q160/NE2(3.2)	E215/OE1(2.8-3.0) E215/OE2(3.0-3.2) Q160/NE2(3.0-3.2)	E215/OE1(2.7) E215/OE2(3.0-3.1) Q160/NE2(3.2)	E100/OE1(2.6) E100/OE2(3.0)	D302/OD1(3.5) D302/OD2(2.7)
N1	V243/N(3.1)	V243/N(3.0)	V243/N(3.1)	V243/N(3.0)	V243/N(3.0-3.1)	V243/N(3.0-3.1)	V128/N(3.3)	I330/N(2.9)
N6	S272/OG(3.4) E244/OE1(3.1)	S272/OG(3.1) E244/OE2(2.8)	S272/OG(3.4) E244/OE1(3.1)	S272/OG(3.2) E244/OE1(3.0)	S272/OG(3.2-3.4) E244/OE1(2.8-2.9)	S272/OG(3.1) E244/OE1(2.8-2.9)	T158/OG(3.8) E129/OE2(3.8)	S360/OG(3.1) E331/OE2(2.9)

## Sheet: Table S3
Table S3. Comparison of water hydrogen bonds of 1 and SNF in complex with human CARM1 (PDB 4IKP and 2Y1W). The key variations of the water hydrogen bonds with 1 in comparison with SNF were observed at the former’s NZ and OXT and CARM1’s Q160 region. Bond distances of Å are displayed in parenthesis and the specific interacting atoms were shown as the following: N and O for backbone nitrogen and ox…
	1a								SNF
	CARM1 (4IKP)								CARM1 (2Y1W)
	Chain A		Chain B		Chain C		Chain D		Chain A, B, C & D
	WHB1	WHB2	WHB1	WHB2	WHB1	WHB2	WHB1	WHB2	WHB1	WHB2
NZ-1a NE-SNF	III W745(3.1)	M260/O(2.8)	W751(2.9)	Y150/OH(3.1)	W753(2.8)	M260/O(2.7)	NI		W(2.6-2.8)	S272/OG(2.8-3.3)
		E258/OE2(2.9)		E267/OE1(2.7)		E258/OE2(2.8)
	IV W745(2.7)	M260/O(2.8)
		E258/OE2(2.9)
	IV W667(3.1)	Y154/OH(3.1)
αN	W617(2.8)	D191/OD2(2.7)	W628(2.7)	D191/OD2(3.0)	W604(2.7)	D191/OD2(2.9)	W616(2.8)	D191/OD2(2.8)	W(2.6-3.0)	D191/OD1(2.8-3.0)
		V192/O(2.9)		V192/O(2.8)		V192/O(2.9)		V192/O(2.7)		V192/O(2.8-3.0)
		G193/O(2.9)		G193/O(2.8)		G193/O(3.0)		G193/O(2.8)		G193/O(2.9-3.1)
		E258/N(3.2)		E258/N(3.1)		E258/N(3.1)		E258/N(3.2)		E258/N(3.0-3.2)
	W615(2.9)	D191/OD1(2.8)	W605(2.9)	D191/OD1(2.8)	W601(2.9)	D191/OD1(2.9)	W602(3.0)	D191/OD1(2.7)	W(2.7-3.2)	D191/OD2(2.6-2.7)
		C194/O(2.6)		C194/O(2.7)		C194/O(2.7)		C194/O(2.6)		C194/O(2.5-2.8)
		L199/N(3.0)		L199/N(2.9)		L199/N(2.9)		L199/N(3.0)		L199/N(2.7-3.0)
	W784(3.2)	E258/OE1(2.8)
O	(2.9)W753		NI		NI		NI		NI
OXT	NI		W604(2.7)	S196/OG(2.7)	NI		W613(2.8)	S196/OG(2.6)	W (2.6-2.7)	S196/OG(2.6-2.8)
				S196/N(3.4)				S196/N(3.2)	(CHAIN A & D)	S196/N(3.1)
				Q160/OE1(2.8)				Q160/OE1(2.8)		Q160/OE1(2.5-2.6)
3'OH	(2.9)W777	(2.8)Y154/O	NI		NI		NI
		(2.7)Q160/OE1
N7	NI		NI		NI		NI		W(2.8-3.0)	S272/OG(2.7-3.3)

## Sheet: Table S4
Table S4. Water hydrogen bonds of SAH in complex with CARM1 (PDB 2Y1X). The water hydrogen bonds of SAH in complex with CARM1 are shown with the bond distances of Å in parenthesis and the specific interacting atoms as the following: N and O for backbone nitrogen and oxygen; OG for the side chain oxygen of Ser; OH for the side chain hydroxyl group of Tyr; OD1 and OD2 for the chain carbonyl oxygen …
	SAH
	CARM1 (2Y1X)								PRMT1 (1OR1)		PRMT3 (2FYT)
	Chain A		Chain B		Chain C		Chain D
	WHB1	WHB2	WHB1	WHB2	WHB1	WHB2	WHB1	WHB2	WHB1	WHB2	WHB1	WHB2
αN	W2019(2.9)	D191/OD2(2.6) L199/N(2.8) C194/O(2.7)	W2015(2.9)	D191/OD1(2.6) V192/O(3.0) G193/O(3.1) E258/N(3.1)	W2027(2.8)	V192/O(2.8) G193/O(3.0) E258/N(3.0) C194/O(2.9)	W2020(3.0)	V192/O(2.8) G193/O(3.1) E258/N(3.1)	W373(2.8)	D76/OD2(2.6) V77/O(3.2) G78/O(3.0) E144/N(3.2)	W562(2.9)	D278/OD2(2.9) V279/O(2.8) G280/O(3.0) E346/N(2.9)
			W2016(2.8)	D191/OD2(2.8) C194/O(2.5) L199/N(2.8)	W2029(3.2)	C194/O(2.9)	W2021(2.6)	D191/OD2(3.1) C194/O(2.3) L199/N(3.1)	W372(3.0)	D76/OD1(2.7) S79/O(2.8) L84/N(3.0)	W550(2.9)	D278/OD1(2.6) C281/O(2.6) L286/N(2.8)
OXT	W2122(2.5)	S196/OG(2.7) S196/N(2.9) Q160/OE1(2.8)	W2006(3.0)	S196/OG(3.0) S196/N(3.0) Q160/OE1(2.5)	W2137(2.5)	S196/OG(2.7) S196/N(3.2) Q160/OE1(2.9)	W2022(2.8)	S196/OG(2.8) S196/N(3.0) Q160/OE1(2.8)	W374(2.4)	T81/OG1(2.9) T81/N(3.2) H45/ND1(3.0)	W552(2.8)	T283/OG1(2.8) T283/N(3.0)
N7	W2123(2.8)	S272/OG(3.3)	W2035(3.0)	S272/OG(2.8)	W2136(2.6)	S272/OG(3.0)	W2112(2.8)	S272/OG(2.8)			W582(3.0)	S360/OG(3.0) R530/NH1(2.8) R530/NH2(3.2)

## Sheet: Table S5
Table S5. Numbers and percentages of the cells classified by their origins and cell-cycle stages for scRNA-seq analysis.
Cell numbers		Conditions
	% of treatment	DMSO	% in DMSO	SKI-73N	% in SKI-73N	SKI-73	% in SKI-73	Total		Invasion cells
Cell cycle	G0/G1	2515	0.613564	2248	0.627407	2122	0.656559	6885		891	0.234906
	G2/M	989	0.241278	859	0.239743	661	0.204517	2509		1092	0.287899
	S	595	0.145157	476	0.13285	449	0.138923	1520		1810	0.477195
	Total	4099		3583		3232		10914		3793

## Sheet: Table S6
Table S6. Population analysis of G0/G1-phase cells treated with DMSO, SKI-73N and SKI-73
6, 7, 8, 9, 14	Invasion-cell-related subpopulations uncovered via unsupervised correlation analysis
	Subpopulations	1	7	12	15	0	2	8	11	13	14	17	19	3	5	6	4	16	10	18	20	9		Total
Cell numbers/treatment	DMSO	209	125	85	64	328	258	205	159	145	101	56	38	178	140	117	35	1	128	32	13	98		2515
	SKI-73N	193	117	91	76	386	217	103	103	71	103	36	23	151	135	123	35	1	99	25	33	127		2248
	SKI73	202	123	77	62	67	67	52	51	35	37	20	14	182	147	159	410	168	101	23	9	116		2122
% within each treatment	DMSO%	0.0831014	0.0497018	0.0337972	0.0254473	0.130417	0.102584	0.0815109	0.0632207	0.0576541	0.040159	0.0222664	0.0151093	0.0707753	0.055666	0.0465209	0.0139165	0.000397614	0.0508946	0.0127237	0.00516899	0.0389662
	SKI-73N%	0.0858541	0.0520463	0.0404804	0.0338078	0.171708	0.0965302	0.0458185	0.0458185	0.0315836	0.0458185	0.0160142	0.0102313	0.0671708	0.0600534	0.0547153	0.0155694	0.00044484	0.0440391	0.011121	0.0146797	0.0564947
	SKI-73%	0.0951932	0.0579642	0.0362865	0.0292177	0.031574	0.031574	0.0245052	0.0240339	0.0164939	0.0174364	0.00942507	0.00659755	0.0857681	0.0692743	0.0749293	0.193214	0.0791706	0.0475966	0.0108388	0.00424128	0.0546654
																*
Depleted	SKI-73N/DMSO	0.923445	0.936	1.07059	1.1875	1.17683	0.841085	0.502439	0.647799	0.489655	1.0198	0.642857	0.605263	0.848315	0.964286	1.05128	1	1	0.773438	0.78125	2.53846	1.29592
Emerging	SKI-73/DMSO	1.14551	1.16624	1.07365	1.14817	0.242099	0.307785	0.300637	0.380159	0.286083	0.434183	0.423287	0.436654	1.21184	1.24446	1.61066	13.8838	199.114	0.935199	0.851864	0.820525	1.40289
	Classified categories	Commonly resistant				Differentially depleted---SKI-73-specific								Differentially emerging---SKI-73-specific					Differentially depleted---SKI-73N-specific		Differentially emerging---SKI-73N-specific	Commonly emerging

## Sheet: Table S7
Table S7. Population analysis of S-phase cells treated with DMSO, SKI-73N and SKI-73
0, 3	Invasion-cell-related subpopulations uncovered via unsupervised correlation analysis
	Subpopulations	2	4	5	3	6	0	1		Total
Cell numbers/treatment	DMSO	103	65	29	106	7	156	129		595
	SKI-73N	86	51	24	70	6	100	139		476
	SKI-73	86	54	25	51	10	119	104		449
% within each treatment	DMSO%	0.173109	0.109244	0.0487395	0.178151	0.0117647	0.262185	0.216807
	SKI-73N%	0.180672	0.107143	0.0504202	0.147059	0.012605	0.210084	0.292017
	SKI-73%	0.191537	0.120267	0.0556793	0.113586	0.0222717	0.265033	0.231626
Depleted	SKI-73N/DMSO	1.04369	0.980769	1.03448	0.825472	1.07143	0.801282	1.3469
Emerging	SKI-73/DMSO	1.10645	1.10091	1.14239	0.63758	1.8931	1.01086	1.06835
	Classified categories	Commonly resistant			Differentially depleted---SKI-73-specific	Differentially emerging---SKI-73-specific	Differentially depleted---SKI-73N-specific	Differentially emerging---SKI-73N-specific

## Sheet: Table S8
Table S8. Population analysis of G2/M-phase cells treated with DMSO, SKI-73N and SKI-73
1, 2	Invasion-cell-related subpopulations uncovered via unsupervised correlation analysis
	Subpopulations	1	2	3	0	5	4		Total
Cell numbers	DMSO	249	259	191	225	25	40		989
	SKI-73N	228	168	127	270	32	34		859
	SKI-73	181	125	100	194	28	33		661
% within each treatment	DMSO%	0.251769	0.261881	0.193124	0.227503	0.0252781	0.0404449
	SKI-73N%	0.265425	0.195576	0.147846	0.314319	0.0372526	0.0395809
	SKI-73%	0.273828	0.189107	0.151286	0.293495	0.0423601	0.0499244
Depleted	SKI-73N/DMSO	1.05424	0.746814	0.76555	1.38161	1.47371	0.978638
Emerging	SKI-73/DMSO	1.08761	0.722113	0.78336	1.29007	1.67576	1.23438
	Classified categories	Commonly resistant	Commonly depleted		Commonly emerging		Differentially emerging---SKI-73-specific

## Sheet: Table S9
Table S9. Differential gene expression of G0/G1-phase “invasion cells” and the cells treated with DMSO, SKI-73 and SKI-73N
Top 20 upregulated transcripts in invasion or invasion-prone cells with implicated cancer relevance
Top 10 downregulated transcripts in invasion or invasion-prone cells with implicated cancer relevance
	p_val	avg_logFC	pct.1	pct.2	p_val_adj	score
PTTG1	0	1.12876	0.725	0.311	0	0.467307
TUBA1B	0	0.865011	0.917	0.671	0	0.212793
H2AFZ	0	0.852214	0.979	0.912	0	0.0570983
STMN1	0	0.822869	0.933	0.719	0	0.176094
HMGN2	0	0.811228	0.955	0.808	0	0.119251
UBE2S	8.49761e-242	0.792375	0.605	0.283	1.54138e-237	0.255145
CKS1B	1.01708e-299	0.780489	0.813	0.527	1.84488e-295	0.22322
CDKN3	0	0.75642	0.598	0.2	0	0.301055
DKK1	1.69829e-168	0.709919	0.852	0.664	3.08053e-164	0.133465
HMGB1	0	0.660139	0.973	0.848	0	0.0825174
CYR61	8.03024e-195	0.657255	0.911	0.774	1.45661e-190	0.090044
G0S2	2.31428e-37	0.645333	0.585	0.459	4.19787e-33	0.081312
HMGA1	2.61418e-244	0.596743	0.901	0.646	4.74187e-240	0.152169
TNFRSF12A	4.40649e-259	0.596336	0.871	0.608	7.99293e-255	0.156836
LSM5	9.31905e-283	0.569448	0.907	0.71	1.69038e-278	0.112181
HNRNPA2B1	0	0.560004	0.983	0.894	0	0.0498404
SNRPB	6.06744e-292	0.555162	0.915	0.697	1.10057e-287	0.121025
PRKCDBP	7.26801e-252	0.545794	0.883	0.651	1.31834e-247	0.126624
SMS	2.28793e-206	0.541934	0.829	0.62	4.15007e-202	0.113264
RAN	2.41473e-282	0.540106	0.959	0.847	4.38008e-278	0.0604919
HSP90AA1	0	0.538238	0.985	0.931	0	0.0290648
CTGF	1.19984e-131	0.532947	0.69	0.453	2.17638e-127	0.126309
ANKRD1	6.47669e-130	0.528036	0.73	0.501	1.17481e-125	0.12092
PHLDA2	2.33583e-190	0.525114	0.872	0.652	4.23696e-186	0.115525
CCND1	1.00568e-213	0.523707	0.929	0.725	1.8242e-209	0.106836
SNRPD1	4.54555e-247	0.515821	0.916	0.757	8.24518e-243	0.0820155
SRM	1.09149e-239	0.51486	0.827	0.558	1.97985e-235	0.138497
SNRPG	2.06897e-299	0.512861	0.966	0.863	3.7529e-295	0.0528247
RANBP1	3.37344e-237	0.507946	0.836	0.579	6.11909e-233	0.130542
KIAA0101	1.49402e-202	0.499045	0.519	0.201	2.71e-198	0.158696
PPP1R14B	1.52946e-216	0.496298	0.905	0.744	2.77428e-212	0.079904
MT2A	1.69738e-153	0.493426	0.956	0.858	3.07888e-149	0.0483558
C12ORF75	1.61678e-223	0.491613	0.827	0.544	2.93268e-219	0.139126
CYCS	6.43985e-212	0.490556	0.847	0.625	1.16812e-207	0.108903
EBNA1BP2	2.11142e-215	0.490406	0.732	0.437	3.8299e-211	0.14467
H2AFV	1.90566e-261	0.485448	0.957	0.848	3.45668e-257	0.0529138
UCP2	6.06501e-91	0.48287	0.633	0.445	1.10013e-86	0.0907796
PRELID1	0	0.479263	0.984	0.911	0	0.0349862
F3	1.26698e-132	0.477444	0.787	0.591	2.29817e-128	0.0935789
DTYMK	3.3027e-206	0.474393	0.603	0.29	5.99076e-202	0.148485
MYEOV	5.03545e-182	0.468759	0.608	0.31	9.13379e-178	0.13969
HNRNPAB	1.02795e-192	0.46857	0.644	0.343	1.8646e-188	0.141039
CENPW	8.18969e-289	0.465234	0.458	0.103	1.48553e-284	0.165158
PSMA7	1.67512e-291	0.459859	0.995	0.969	3.03849e-287	0.0119563
NME1	3.39053e-209	0.458749	0.899	0.686	6.15009e-205	0.0977135
TK1	2.11984e-266	0.457706	0.489	0.136	3.84518e-262	0.16157
HMGN1	2.195e-250	0.454254	0.977	0.923	3.98151e-246	0.0245297
HN1	3.45915e-200	0.451455	0.924	0.793	6.27454e-196	0.0591406
PHF19	4.26063e-198	0.431163	0.435	0.145	7.72835e-194	0.125037
DRAP1	1.43012e-206	0.426974	0.971	0.885	2.5941e-202	0.0367197
CCT5	1.03714e-173	0.426844	0.73	0.453	1.88127e-169	0.118236
BIRC5	1.62712e-215	0.422336	0.41	0.113	2.95144e-211	0.125434
HSPD1	2.82355e-167	0.420045	0.834	0.62	5.12164e-163	0.0898896
FOSL1	1.2958e-136	0.416498	0.472	0.222	2.35045e-132	0.104124
FST	3.3259e-62	0.414196	0.491	0.316	6.03285e-58	0.0724843
ITGB1BP1	2.74325e-171	0.40637	0.859	0.676	4.97598e-167	0.0743656
HSPE1	2.29257e-214	0.405574	0.97	0.903	4.1585e-210	0.0271734
OGFRL1	6.21643e-140	0.400689	0.712	0.466	1.1276e-135	0.0985696
TUBA1C	2.05398e-119	0.400358	0.653	0.428	3.72571e-115	0.0900804
C1QBP	2.1229e-180	0.400111	0.922	0.783	3.85072e-176	0.0556154
LSM4	1.43059e-183	0.399843	0.91	0.733	2.59494e-179	0.0707722
DDX21	8.87067e-131	0.396427	0.635	0.389	1.60905e-126	0.097521
BANF1	7.32691e-211	0.396077	0.962	0.874	1.32903e-206	0.0348547
COTL1	7.37947e-159	0.386533	0.882	0.694	1.33856e-154	0.0726681
TMEM14B	2.85665e-189	0.383827	0.983	0.939	5.18167e-185	0.0168884
PTMA	4.14789e-249	0.383658	1	0.998	7.52386e-245	0.000767317
SERPINE1	2.2362e-66	0.383642	0.385	0.216	4.05624e-62	0.0648355
ARPC2	9.49235e-212	0.382849	0.978	0.917	1.72182e-207	0.0233538
HMGB3	1.42396e-169	0.381555	0.439	0.164	2.58292e-165	0.104928
TOMM40	1.62982e-142	0.379764	0.575	0.313	2.95632e-138	0.0994981
DEK	3.4434e-133	0.371508	0.93	0.858	6.24598e-129	0.0267486
PPME1	8.3346e-95	0.369014	0.494	0.285	1.51181e-90	0.0771239
CALM2	2.10567e-216	0.366652	0.997	0.992	3.81947e-212	0.00183326
NCL	1.2251e-113	0.365074	0.827	0.688	2.22221e-109	0.0507453
PSMB1	1.54563e-143	0.363701	0.95	0.859	2.80362e-139	0.0330967
PDCD5	1.41838e-148	0.36169	0.92	0.808	2.57281e-144	0.0405092
PFN1	2.20162e-292	0.361448	0.999	0.997	3.99352e-288	0.000722896
LSM3	1.37046e-160	0.358492	0.928	0.816	2.48588e-156	0.0401511
RPL39L	1.09749e-129	0.357265	0.552	0.297	1.99073e-125	0.0911025
HNRNPA3	1.42542e-134	0.355671	0.834	0.662	2.58557e-130	0.0611754
HNRNPM	1.858e-140	0.35504	0.665	0.392	3.37023e-136	0.0969259
PSMD2	4.17114e-128	0.35446	0.752	0.524	7.56603e-124	0.0808168
AP1M2	1.3333e-120	0.354336	0.596	0.356	2.41848e-116	0.0850407
TYMS	9.11613e-170	0.353248	0.385	0.121	1.65358e-165	0.0932575
PSMB7	2.77458e-123	0.349532	0.874	0.733	5.03281e-119	0.049284
EIF1AX	1.78007e-127	0.349235	0.879	0.74	3.22886e-123	0.0485437
MTDH	1.17796e-155	0.346456	0.972	0.91	2.13671e-151	0.0214803
CENPF	2.57169e-99	0.34624	0.335	0.142	4.6648e-95	0.0668244
LRRC59	9.43031e-119	0.345636	0.653	0.425	1.71056e-114	0.0788051
ATP5G1	4.00202e-139	0.345003	0.889	0.762	7.25926e-135	0.0438153
TPM3	3.37985e-144	0.342423	0.905	0.749	6.1307e-140	0.053418
NHP2	1.4038e-138	0.34228	0.905	0.765	2.54636e-134	0.0479191
SRSF7	1.59499e-110	0.342252	0.795	0.628	2.89316e-106	0.057156
SSRP1	1.93142e-128	0.341751	0.65	0.402	3.50341e-124	0.0847542
LMNA	6.87338e-123	0.341093	0.955	0.865	1.24676e-118	0.0306983
ODC1	2.14866e-180	0.34094	0.369	0.105	3.89745e-176	0.0900082
SKA2	1.25974e-122	0.340028	0.772	0.578	2.28504e-118	0.0659654
AURKAIP1	7.91894e-131	0.339856	0.905	0.805	1.43642e-126	0.0339856
CCT6A	1.48062e-116	0.339266	0.715	0.507	2.68569e-112	0.0705673
NDUFS6	2.96416e-141	0.339177	0.915	0.777	5.37669e-137	0.0468064
TPM4	3.50463e-121	0.336535	0.892	0.763	6.35704e-117	0.043413
GTF2A2	3.06015e-121	0.335384	0.807	0.627	5.55082e-117	0.0603692
HPCAL1	1.57095e-103	0.335069	0.827	0.657	2.84954e-99	0.0569618
EEF1E1	5.72071e-119	0.334835	0.625	0.388	1.03768e-114	0.0793559
PSMA4	8.75482e-111	0.329685	0.797	0.609	1.58804e-106	0.0619808
MT1E	1.82135e-63	0.32879	0.673	0.509	3.30375e-59	0.0539216
SLIRP	1.95065e-125	0.32838	0.895	0.763	3.53828e-121	0.0433461
BOLA3	4.77927e-120	0.328378	0.671	0.436	8.66911e-116	0.0771689
POLD2	1.47048e-119	0.327476	0.737	0.526	2.6673e-115	0.0690974
C17ORF89	3.82914e-128	0.325998	0.863	0.703	6.94567e-124	0.0521597
ARHGAP29	1.91944e-68	0.325542	0.792	0.663	3.48168e-64	0.0419949
SNRPF	6.6654e-111	0.325507	0.812	0.641	1.20904e-106	0.0556617
NOP16	1.84989e-123	0.323555	0.449	0.208	3.35551e-119	0.0779766
HRAS	1.79433e-113	0.322451	0.797	0.611	3.25473e-109	0.0599759
NUCKS1	6.47429e-99	0.322262	0.927	0.871	1.17437e-94	0.0180467
CCDC85B	1.8898e-129	0.322127	0.981	0.927	3.4279e-125	0.0173949
PFDN2	1.72084e-99	0.321102	0.835	0.705	3.12144e-95	0.0417432
PPM1G	3.60282e-103	0.319511	0.586	0.371	6.53516e-99	0.0686949
PDAP1	9.29212e-112	0.319058	0.813	0.63	1.6855e-107	0.0583876
RHEB	3.1426e-108	0.317317	0.97	0.931	5.70036e-104	0.0123754
SEPT7	1.08966e-115	0.316788	0.905	0.79	1.97654e-111	0.0364306
ERH	4.72947e-117	0.316687	0.883	0.756	8.57878e-113	0.0402193
HNRNPR	2.40882e-108	0.315958	0.673	0.458	4.36935e-104	0.067931
PSMB3	1.05145e-119	0.315814	0.903	0.779	1.90722e-115	0.0391609
PSMB6	3.46913e-120	0.315417	0.913	0.805	6.29266e-116	0.0340651
ZNF706	8.84753e-87	0.315043	0.904	0.81	1.60485e-82	0.029614
EIF6	3.34277e-86	0.313764	0.822	0.671	6.06345e-82	0.0473784
WDR1	2.55736e-110	0.312305	0.851	0.676	4.6388e-106	0.0546533
LSM7	1.26663e-107	0.311478	0.797	0.62	2.29755e-103	0.0551316
TIMM13	3.70858e-116	0.310991	0.92	0.817	6.72699e-112	0.0320321
GADD45GIP1	2.2659e-119	0.31016	0.944	0.86	4.11011e-115	0.0260534
CYC1	7.38889e-98	0.309701	0.853	0.727	1.34027e-93	0.0390223
IFRD2	4.83501e-112	0.309207	0.567	0.329	8.77022e-108	0.0735913
TARS	1.14832e-80	0.308645	0.678	0.492	2.08295e-76	0.0574081
MRPL14	5.06598e-134	0.307995	0.982	0.933	9.18919e-130	0.0150917
HSP90AB1	6.09928e-97	0.307657	0.976	0.937	1.10635e-92	0.0119986
ANXA2	2.26767e-142	0.307137	0.997	0.981	4.11332e-138	0.0049142
RPL22L1	7.48484e-69	0.306659	0.631	0.465	1.35768e-64	0.0509053
GLRX5	6.25054e-100	0.306185	0.711	0.515	1.13379e-95	0.0600123
ITGAE	3.89453e-98	0.306023	0.781	0.604	7.06428e-94	0.054166
ANP32B	1.12013e-88	0.305888	0.81	0.669	2.0318e-84	0.0431303
HDGF	4.82995e-100	0.304745	0.767	0.578	8.76105e-96	0.0575968
TUBB4B	2.20221e-79	0.304037	0.755	0.578	3.99459e-75	0.0538145
TAF9	1.26243e-92	0.304012	0.791	0.628	2.28993e-88	0.049554
UBB	4.83879e-137	0.302779	0.987	0.959	8.77707e-133	0.00847782
MTCH2	3.20862e-98	0.302031	0.739	0.559	5.82011e-94	0.0543655
PHB	7.98561e-108	0.301413	0.837	0.679	1.44851e-103	0.0476232
PSMA5	1.15977e-89	0.300199	0.753	0.576	2.1037e-85	0.0531353
NPM3	8.91841e-108	0.300127	0.517	0.289	1.61771e-103	0.0684289
SRSF9	6.04151e-106	0.299285	0.898	0.794	1.09587e-101	0.0311256
DCUN1D5	4.95588e-91	0.298716	0.638	0.439	8.98947e-87	0.0594444
ARL6IP1	4.327e-39	0.29685	0.503	0.386	7.84875e-35	0.0347314
RUVBL2	1.8658e-100	0.2964	0.514	0.293	3.38438e-96	0.0655044
SET	6.17798e-106	0.296079	0.959	0.912	1.12062e-101	0.0139157
CHCHD2	2.32179e-207	0.294817	0.996	0.989	4.21149e-203	0.00206372
CDC42EP3	3.46722e-71	0.294526	0.794	0.654	6.28919e-67	0.0412337
RPSA	4.23839e-136	0.294013	0.994	0.974	7.68801e-132	0.00588025
SLC25A5	2.52777e-84	0.293614	0.889	0.794	4.58512e-80	0.0278933
EIF4G2	1.40939e-93	0.293089	0.878	0.756	2.5565e-89	0.0357569
SSBP1	9.08263e-116	0.292995	0.946	0.855	1.6475e-111	0.0266626
GNL3	2.97485e-94	0.292248	0.579	0.36	5.39608e-90	0.0640023
CFL1	3.79729e-208	0.290658	1	0.999	6.8879e-204	0.000290658
C20ORF27	3.33728e-83	0.28895	0.633	0.444	6.05349e-79	0.0546116
DNAJB6	3.14524e-89	0.288356	0.896	0.773	5.70514e-85	0.0354677
YBX1	8.3887e-138	0.287595	0.997	0.989	1.52163e-133	0.00230076
CLTB	2.39231e-95	0.287445	0.65	0.439	4.33941e-91	0.0606508
STRA13	8.63492e-87	0.287154	0.694	0.501	1.56629e-82	0.0554208
TGM2	9.03986e-52	0.28686	0.802	0.689	1.63974e-47	0.0324152
AXL	1.45108e-82	0.286396	0.913	0.797	2.63212e-78	0.0332219
SURF4	6.12755e-90	0.286358	0.764	0.579	1.11148e-85	0.0529762
PSMD8	5.04749e-102	0.286113	0.886	0.757	9.15565e-98	0.0369086
PTRF	4.58296e-102	0.285836	0.912	0.799	8.31303e-98	0.0322995
RRBP1	1.17243e-91	0.285434	0.866	0.732	2.12668e-87	0.0382481
SERBP1	1.41311e-93	0.285228	0.866	0.73	2.56325e-89	0.038791
EIF4EBP1	2.69678e-84	0.284968	0.605	0.405	4.89169e-80	0.0569937
DUT	7.97367e-77	0.282447	0.589	0.395	1.44634e-72	0.0547946
MCFD2	1.69242e-78	0.280721	0.844	0.719	3.06988e-74	0.0350901
EIF4G1	4.97068e-89	0.280201	0.757	0.579	9.01632e-85	0.0498757
SUB1	4.09858e-129	0.279584	0.977	0.933	7.43441e-125	0.0123017
SNRPE	3.53851e-113	0.279448	0.959	0.902	6.4185e-109	0.0159286
PAWR	8.2503e-71	0.277985	0.606	0.425	1.49652e-66	0.0503152
TROAP	1.32655e-158	0.276434	0.307	0.076	2.40623e-154	0.0638563
ACTN1	1.61781e-68	0.275852	0.742	0.579	2.93454e-64	0.0449639
FDPS	5.54962e-57	0.275514	0.726	0.595	1.00665e-52	0.0360923
HNRNPH3	1.91535e-80	0.275046	0.615	0.421	3.47425e-76	0.053359
RPA3	5.90887e-76	0.274489	0.712	0.543	1.07181e-71	0.0463886
DNMT1	9.77875e-82	0.274424	0.49	0.294	1.77377e-77	0.0537871
MRPL51	1.86554e-110	0.274291	0.951	0.852	3.3839e-106	0.0271548
UQCRFS1	2.27111e-88	0.274162	0.883	0.781	4.11957e-84	0.0279645
DAZAP1	3.39984e-107	0.273888	0.439	0.214	6.16697e-103	0.0616248
YWHAB	2.92515e-140	0.273517	0.99	0.96	5.30594e-136	0.0082055
CTNNAL1	1.12634e-96	0.273478	0.953	0.879	2.04307e-92	0.0202374
RAC1	6.10373e-106	0.273432	0.983	0.954	1.10716e-101	0.00792953
H2AFY	4.25057e-87	0.27332	0.864	0.729	7.71012e-83	0.0368982
MRPL36	7.12165e-85	0.273075	0.876	0.778	1.2918e-80	0.0267614
STOML2	3.02146e-93	0.272846	0.874	0.747	5.48062e-89	0.0346514
SIVA1	4.46793e-78	0.272836	0.807	0.688	8.10438e-74	0.0324675
POMP	9.3548e-122	0.272755	0.977	0.928	1.69687e-117	0.013365
MRPL52	9.81858e-77	0.272204	0.737	0.571	1.78099e-72	0.0451858
EI24	3.26161e-90	0.272038	0.885	0.763	5.91624e-86	0.0331886
CENPM	2.038e-159	0.271825	0.297	0.072	3.69673e-155	0.0611607
PSMB2	2.70489e-74	0.271646	0.761	0.599	4.90641e-70	0.0440067
COA4	3.0022e-86	0.270843	0.858	0.731	5.44569e-82	0.0343971
HNRNPD	3.65302e-83	0.270298	0.712	0.528	6.62622e-79	0.0497348
LYAR	7.77904e-81	0.27026	0.466	0.268	1.41104e-76	0.0535114
PGAM1	7.28965e-82	0.2702	0.967	0.922	1.32227e-77	0.012159
PRDX1	2.52304e-89	0.270198	0.967	0.918	4.57655e-85	0.0132397
RPS19BP1	4.36533e-81	0.269245	0.781	0.619	7.91828e-77	0.0436176
ABCE1	5.19032e-90	0.269205	0.465	0.254	9.41471e-86	0.0568022
UQCC2	4.8478e-78	0.269084	0.73	0.537	8.79343e-74	0.0519332
UBE2N	9.50808e-81	0.268919	0.669	0.483	1.72467e-76	0.0500189
CMSS1	7.14187e-103	0.268583	0.468	0.238	1.29546e-98	0.0617742
ACTN4	1.11259e-86	0.268415	0.891	0.763	2.01812e-82	0.0343571
PA2G4	2.28388e-81	0.267851	0.553	0.356	4.14273e-77	0.0527666
POLR2F	3.2778e-84	0.26783	0.821	0.686	5.9456e-80	0.0361571
ENY2	5.13188e-100	0.267786	0.959	0.906	9.30872e-96	0.0141927
YWHAZ	5.14381e-95	0.267548	0.971	0.924	9.33035e-91	0.0125747
RPL7L1	5.05948e-88	0.267441	0.918	0.837	9.17739e-84	0.0216627
EIF5A	9.05382e-93	0.266671	0.706	0.506	1.64227e-88	0.0533343
AP2S1	8.56579e-107	0.266547	0.97	0.927	1.55375e-102	0.0114615
MRPL11	7.96824e-85	0.264593	0.808	0.673	1.44536e-80	0.0357201
CALM1	3.00764e-86	0.26278	0.942	0.849	5.45556e-82	0.0244385
FAM136A	1.06268e-77	0.262742	0.623	0.437	1.9276e-73	0.04887
ANP32E	2.42481e-80	0.262468	0.429	0.237	4.39836e-76	0.0503939
LMNB2	2.17007e-114	0.261977	0.357	0.14	3.93629e-110	0.0568491
HNRNPK	5.43484e-92	0.261808	0.906	0.804	9.85826e-88	0.0267044
LSM10	3.47492e-81	0.26173	0.526	0.324	6.30316e-77	0.0528695
SNRPC	1.20036e-86	0.261627	0.905	0.814	2.17733e-82	0.0238081
TUBB6	1.45902e-73	0.261333	0.588	0.402	2.64651e-69	0.048608
PSMD11	3.14228e-76	0.260532	0.588	0.398	5.69977e-72	0.0495011
HBEGF	7.09477e-85	0.259942	0.35	0.163	1.28692e-80	0.0486091
NT5E	7.8326e-77	0.259599	0.525	0.322	1.42076e-72	0.0526986
PSMC5	2.02993e-76	0.259407	0.644	0.452	3.6821e-72	0.0498062
PSME2	2.10551e-59	0.259327	0.736	0.578	3.81919e-55	0.0409737
WDR34	8.89337e-74	0.258748	0.612	0.422	1.61317e-69	0.0491621
SNRPA1	2.01328e-66	0.257247	0.562	0.386	3.6519e-62	0.0452755
CACYBP	3.11524e-62	0.257106	0.77	0.639	5.65074e-58	0.0336809
PTGES3	1.68061e-69	0.25586	0.787	0.671	3.04845e-65	0.0296798
PSMA3	8.85145e-70	0.255769	0.734	0.578	1.60556e-65	0.0398999
ARHGDIA	4.49664e-75	0.255761	0.83	0.694	8.15646e-71	0.0347834
ADI1	9.74306e-69	0.254915	0.754	0.596	1.76729e-64	0.0402766
RPS26	2.01443e-122	0.254758	0.987	0.975	3.65397e-118	0.0030571
IGFBP4	9.71761e-70	0.254462	0.923	0.847	1.76268e-65	0.0193391
UBE2D2	2.75472e-67	0.254403	0.78	0.652	4.99679e-63	0.0325636
CENPN	1.6087e-141	0.253985	0.332	0.101	2.91803e-137	0.0586705
GPATCH4	1.32001e-79	0.253636	0.427	0.233	2.39436e-75	0.0492054
COX8A	5.93553e-137	0.253118	0.997	0.979	1.07665e-132	0.00455613
EIF2S2	7.73693e-81	0.252617	0.89	0.809	1.4034e-76	0.020462
CSE1L	2.24495e-93	0.252138	0.439	0.226	4.07212e-89	0.0537053
MRPL13	5.55881e-69	0.25062	0.765	0.623	1.00831e-64	0.0355881
SOX4	3.2653e-33	-0.250977	0.045	0.131	5.92292e-29	0.0215841
SH3BGRL	2.52729e-58	-0.252489	0.474	0.633	4.58425e-54	0.0401458
KRT8	1.14063e-05	-0.252907	0.941	0.912	0.206899	-0.00733429
CTSA	6.86666e-55	-0.258885	0.581	0.71	1.24554e-50	0.0333962
SLC5A3	2.05407e-40	-0.26083	0.453	0.577	3.72588e-36	0.0323429
TMEM141	3.15266e-44	-0.264621	0.659	0.751	5.71861e-40	0.0243452
IGBP1	1.9756e-71	-0.269381	0.424	0.609	3.58355e-67	0.0498356
PLA2G16	1.01284e-98	-0.273833	0.958	0.978	1.83719e-94	0.00547665
RPS4X	9.72717e-110	-0.274326	0.998	1	1.76441e-105	0.000548651
NNMT	6.41471e-37	-0.275773	0.598	0.708	1.16356e-32	0.030335
CPE	1.37578e-74	-0.278242	0.131	0.318	2.49553e-70	0.0520313
SERPINB1	2.72917e-63	-0.278273	0.635	0.754	4.95045e-59	0.0331144
CSF1	8.23457e-63	-0.284481	0.474	0.632	1.49367e-58	0.044948
PSAP	5.46198e-78	-0.288767	0.805	0.882	9.90748e-74	0.022235
EIF3E	2.67334e-91	-0.293267	0.861	0.924	4.84916e-87	0.0184758
IGFBP6	1.33173e-25	-0.297534	0.631	0.7	2.41562e-21	0.0205298
TIMP1	7.17633e-52	-0.299609	0.942	0.954	1.30171e-47	0.00359531
ABCC3	7.41555e-72	-0.303629	0.695	0.807	1.34511e-67	0.0340065
NFKBIA	2.93614e-31	-0.303934	0.503	0.603	5.32587e-27	0.0303934
TPD52L1	1.23851e-82	-0.305717	0.193	0.394	2.24653e-78	0.0614491
NUPR1	9.91586e-78	-0.321888	0.091	0.27	1.79864e-73	0.057618
MRPS6	1.27597e-73	-0.322857	0.874	0.918	2.31447e-69	0.0142057
DDIT4	7.97023e-91	-0.326156	0.635	0.84	1.44572e-86	0.066862
PNRC1	2.5023e-103	-0.339879	0.435	0.656	4.53892e-99	0.0751133
TIMP3	7.09966e-69	-0.341608	0.75	0.852	1.28781e-64	0.034844
LY6E	2.57676e-101	-0.353993	0.953	0.956	4.67398e-97	0.00106198
TKT	1.97975e-83	-0.354693	0.885	0.919	3.59106e-79	0.0120596
CPD	5.42289e-93	-0.356661	0.395	0.606	9.83658e-89	0.0752554
EDIL3	3.41586e-108	-0.356803	0.513	0.718	6.19602e-104	0.0731447
EEF1A1	4.29305e-253	-0.365181	1	1	7.78717e-249	0
RARRES2	1.51384e-115	-0.371657	0.893	0.943	2.74596e-111	0.0185828
CTSD	1.4795e-173	-0.375277	0.993	0.997	2.68366e-169	0.00150111
ID3	6.42665e-88	-0.38114	0.719	0.886	1.16573e-83	0.0636503
JUNB	5.13731e-88	-0.382444	0.235	0.45	9.31856e-84	0.0822255
SCD	5.39329e-142	-0.389136	0.913	0.965	9.78289e-138	0.0202351
IFIT1	1.11594e-14	-0.390555	0.188	0.259	2.0242e-10	0.0277294
CLIC3	8.0591e-86	-0.401836	0.76	0.871	1.46184e-81	0.0446038
CYP1B1	1.03337e-66	-0.402898	0.589	0.743	1.87443e-62	0.0620463
FTH1	2.02547e-239	-0.406741	1	1	3.674e-235	0
RARRES3	8.28941e-67	-0.421672	0.63	0.751	1.50362e-62	0.0510223
FTL	1.77028e-185	-0.42577	1	1	3.21112e-181	0
ADIRF	1.82033e-98	-0.434697	0.718	0.849	3.3019e-94	0.0569453
IFIT3	1.26765e-09	-0.448763	0.219	0.276	2.29939e-05	0.0255795
SAT1	3.28045e-71	-0.449553	0.568	0.709	5.95041e-67	0.0633869
IFIT2	2.80332e-35	-0.455131	0.29	0.417	5.08495e-31	0.0578016
BAG1	2.08414e-185	-0.532394	0.716	0.872	3.78041e-181	0.0830534
IFITM3	9.16426e-235	-0.539511	0.943	0.973	1.66231e-230	0.0161853
TXNIP	1.86104e-168	-0.559545	0.58	0.804	3.37574e-164	0.125338
TNFSF10	3.74081e-149	-0.567883	0.296	0.579	6.78545e-145	0.160711
MALAT1	0	-0.662649	0.999	1	0	0.000662649
NEAT1	0	-0.677903	0.987	0.998	0	0.00745694
UBC	8.19568e-93	-0.685119	0.842	0.88	1.48661e-88	0.0260345
KRT18	2.01026e-60	-0.695771	0.969	0.96	3.64642e-56	-0.00626194
BTG1	4.05697e-294	-0.725125	0.813	0.955	7.35894e-290	0.102968
FN1	1.27322e-253	-0.82424	0.591	0.853	2.30949e-249	0.215951
ISG15	1.15927e-06	-0.889258	0.736	0.67	0.0210281	-0.058691

## Sheet: Table S10
Table S10. Differential gene expression of S-phase “invasion cells” and the cells treated with DMSO, SKI-73 and SKI-73N
	p_val	avg_logFC	pct.1	pct.2	p_val_adj	score
G0S2	1.92092e-152	1.409	0.865	0.601	3.22965e-148	0.371977
SERPINE1	3.89232e-94	0.669535	0.701	0.355	6.54416e-90	0.231659
CD74	1.62272e-100	0.648454	0.79	0.508	2.72828e-96	0.182864
TGM2	8.92527e-100	0.624527	0.927	0.81	1.50061e-95	0.0730696
MORC4	7.03296e-105	0.610733	0.832	0.602	1.18245e-100	0.140469
S100A2	6.64057e-69	0.592583	0.89	0.78	1.11648e-64	0.0651841
RPL10	3.66704e-186	0.562158	1	0.999	6.1654e-182	0.000562158
ZFP36L1	1.92623e-69	0.514771	0.816	0.625	3.23858e-65	0.0983213
CYP1B1	2.34282e-32	0.514567	0.565	0.393	3.93899e-28	0.0885055
BEX3	7.14134e-102	0.4708	0.978	0.95	1.20067e-97	0.0131824
RPL39	2.71295e-185	0.462168	1	1	4.56129e-181	0
CD44	7.1076e-84	0.447441	0.946	0.868	1.195e-79	0.0349004
ZNF706	6.42212e-78	0.439856	0.949	0.898	1.07975e-73	0.0224326
PLAT	7.358e-53	0.430361	0.48	0.221	1.2371e-48	0.111464
PSME2	1.95491e-62	0.413738	0.795	0.623	3.28679e-58	0.071163
PLP2	1.44602e-96	0.411516	0.993	0.963	2.43119e-92	0.0123455
TMEM14B	5.77409e-102	0.407742	0.995	0.976	9.70798e-98	0.00774709
IFI27	1.99575e-52	0.407712	0.894	0.801	3.35546e-48	0.0379172
DCBLD2	8.14991e-55	0.405504	0.801	0.673	1.37024e-50	0.0519045
CDCP1	2.08295e-61	0.401253	0.664	0.431	3.50206e-57	0.0934918
ARHGAP29	5.23192e-48	0.391243	0.894	0.817	8.79643e-44	0.0301257
MYEOV	6.74e-49	0.390255	0.762	0.627	1.1332e-44	0.0526844
TIMM8A	9.22761e-57	0.390252	0.652	0.416	1.55144e-52	0.0920995
TSC22D1	1.34044e-43	0.387	0.617	0.425	2.25369e-39	0.0743039
C15ORF48	1.95851e-45	0.385553	0.909	0.792	3.29285e-41	0.0451097
HLA-B	4.67564e-43	0.383027	0.927	0.887	7.86116e-39	0.0153211
LINC00704	3.4481e-50	0.375636	0.376	0.122	5.79729e-46	0.0954116
SSR4	1.2958e-67	0.373751	0.869	0.741	2.17862e-63	0.0478401
TMEM158	9.99925e-51	0.371665	0.535	0.296	1.68117e-46	0.0888279
HMGA1	8.33243e-39	0.366585	0.962	0.943	1.40093e-34	0.00696511
RARRES3	9.03898e-35	0.352116	0.608	0.407	1.51972e-30	0.0707753
PHLDA2	1.28891e-57	0.351763	0.955	0.915	2.16704e-53	0.0140705
EIF6	2.4828e-44	0.345944	0.908	0.826	4.17433e-40	0.0283674
NAMPT	7.72891e-46	0.337854	0.793	0.67	1.29946e-41	0.0415561
LGALS3	1.71647e-38	0.337552	0.886	0.818	2.8859e-34	0.0229536
RPL22L1	1.78459e-36	0.336729	0.776	0.634	3.00043e-32	0.0478154
LAGE3	1.60272e-50	0.335523	0.791	0.645	2.69465e-46	0.0489863
ADGRF5	1.6171e-45	0.333824	0.38	0.141	2.71883e-41	0.079784
HBEGF	2.56217e-37	0.332988	0.494	0.292	4.30777e-33	0.0672636
CDA	1.1539e-30	0.331934	0.58	0.412	1.94006e-26	0.0557649
S100A16	9.59479e-56	0.331762	0.971	0.934	1.61317e-51	0.0122752
CEMIP	1.53878e-30	0.329505	0.429	0.241	2.58715e-26	0.061947
TM4SF1	1.65495e-35	0.328323	0.693	0.545	2.78247e-31	0.0485918
MORF4L2	1.72626e-49	0.327759	0.783	0.623	2.90236e-45	0.0524414
HLA-A	1.85327e-48	0.325888	0.985	0.966	3.11591e-44	0.00619188
ARF6	7.96687e-53	0.325131	0.919	0.837	1.33947e-48	0.0266607
RBM3	8.37168e-60	0.322861	0.966	0.937	1.40753e-55	0.00936298
SLC25A5	1.40342e-48	0.321575	0.936	0.874	2.35956e-44	0.0199377
ATP2B1	1.09314e-36	0.321323	0.79	0.67	1.8379e-32	0.0385588
PSMB9	7.3573e-44	0.321288	0.567	0.342	1.23698e-39	0.0722897
C19ORF43	5.78013e-58	0.318975	0.958	0.898	9.71813e-54	0.0191385
HLA-C	7.94264e-37	0.314961	0.883	0.807	1.3354e-32	0.023937
RGS10	2.6465e-39	0.313918	0.784	0.694	4.44956e-35	0.0282526
CLIC1	5.38572e-64	0.312637	0.995	0.99	9.055e-60	0.00156318
PSMG4	3.88933e-44	0.309087	0.779	0.644	6.53913e-40	0.0417268
MCTS1	4.27566e-39	0.304737	0.659	0.5	7.18867e-35	0.0484532
NEDD8	3.51686e-65	0.303738	0.984	0.981	5.91289e-61	0.000911214
S100A11	5.14812e-83	0.303164	1	0.997	8.65553e-79	0.000909492
RBPJ	6.48373e-39	0.302136	0.841	0.769	1.09011e-34	0.0217538
B2M	2.54833e-85	0.302094	0.999	0.99	4.28452e-81	0.00271885
EBNA1BP2	1.69856e-33	0.299309	0.836	0.755	2.85579e-29	0.024244
LAMP2	1.40621e-42	0.29886	0.55	0.331	2.36427e-38	0.0654504
NDUFA1	1.62476e-45	0.294816	0.923	0.858	2.73171e-41	0.019163
ACSL5	3.66618e-39	0.291144	0.451	0.237	6.16394e-35	0.0623048
MCFD2	4.97672e-36	0.288766	0.91	0.838	8.36735e-32	0.0207912
IER3	1.77588e-27	0.288464	0.792	0.666	2.98579e-23	0.0363465
SLC9A3R2	1.613e-32	0.288213	0.811	0.736	2.71193e-28	0.0216159
HLA-E	5.6313e-38	0.287563	0.672	0.49	9.46791e-34	0.0523364
ASPH	5.12e-30	0.286511	0.547	0.391	8.60826e-26	0.0446957
RPL36AL	1.24208e-77	0.284568	0.999	0.997	2.08831e-73	0.000569136
MMP24-AS1	9.54369e-38	0.2822	0.957	0.922	1.60458e-33	0.009877
MIR4435-2HG	8.51257e-36	0.282135	0.911	0.846	1.43122e-31	0.0183388
MRPL52	5.81949e-37	0.279351	0.816	0.745	9.78431e-33	0.0198339
FAM127A	1.38286e-36	0.278751	0.636	0.475	2.32501e-32	0.0448789
RPS29	8.2867e-71	0.27761	0.999	0.995	1.39324e-66	0.00111044
SMURF2	1.48559e-31	0.276478	0.822	0.694	2.49773e-27	0.0353891
TMEM14C	8.34219e-55	0.276033	0.972	0.944	1.40257e-50	0.00772893
BIRC3	9.13318e-18	0.274987	0.28	0.145	1.53556e-13	0.0371232
FLNA	7.60575e-40	0.274949	0.903	0.84	1.27875e-35	0.0173218
RPL18A	1.56334e-81	0.270495	1	0.999	2.62844e-77	0.000270495
HPCAL1	1.09065e-26	0.269613	0.889	0.845	1.83371e-22	0.011863
CYR61	2.82941e-15	0.266957	0.915	0.898	4.75709e-11	0.00453828
ITGA2	9.7455e-29	0.263473	0.438	0.268	1.63851e-24	0.0447904
NAA10	5.67993e-30	0.262078	0.67	0.542	9.54967e-26	0.033546
TIMP1	1.18047e-22	0.260661	0.935	0.913	1.98472e-18	0.00573454
PSMA5	1.34382e-23	0.259004	0.773	0.7	2.25937e-19	0.0189073
FAM127B	6.70143e-32	0.258995	0.674	0.528	1.12671e-27	0.0378133
S100A3	2.41505e-30	0.258963	0.552	0.386	4.06042e-26	0.0429879
HSPA8	7.54404e-27	0.256363	0.968	0.934	1.26838e-22	0.00871636
SLC52A2	8.24127e-28	0.253481	0.563	0.418	1.38561e-23	0.0367547
DAD1	8.64927e-35	0.252646	0.885	0.83	1.4542e-30	0.0138955
ARHGAP22	5.76951e-27	0.251862	0.407	0.239	9.70028e-23	0.0423127
PHPT1	5.21944e-43	-0.252669	0.951	0.977	8.77544e-39	0.0065694
PCBP1	3.00228e-29	-0.253652	0.86	0.934	5.04773e-25	0.0187703
FDFT1	2.74976e-33	-0.254954	0.355	0.594	4.62317e-29	0.0609341
LDHA	1.21629e-24	-0.255823	0.994	0.998	2.04495e-20	0.00102329
MT-ND2	1.13677e-67	-0.259489	0.997	0.99	1.91124e-63	-0.00181642
SURF1	4.05598e-37	-0.260451	0.464	0.694	6.81933e-33	0.0599038
PGAM1	1.21746e-35	-0.261328	0.973	0.986	2.04691e-31	0.00339727
FSTL1	5.52006e-28	-0.262204	0.462	0.671	9.28087e-24	0.0548006
SLC1A3	1.62902e-32	-0.264054	0.274	0.498	2.73887e-28	0.0591481
SPTAN1	1.07818e-35	-0.26412	0.466	0.687	1.81274e-31	0.0583705
PLAC8	2.73538e-34	-0.266794	0.808	0.926	4.599e-30	0.0314817
AP2M1	2.74721e-43	-0.27021	0.841	0.935	4.61888e-39	0.0253998
APLP2	2.70506e-39	-0.270513	0.933	0.96	4.54801e-35	0.00730384
NQO1	4.82687e-19	-0.273876	0.809	0.875	8.11542e-15	0.0180758
SET	1.65217e-44	-0.274491	0.979	0.981	2.7778e-40	0.000548981
PTS	9.81198e-28	-0.275109	0.808	0.891	1.64969e-23	0.0228341
IFIT1	1.52446e-18	-0.276422	0.105	0.225	2.56307e-14	0.0331706
CD55	3.47968e-32	-0.281606	0.513	0.723	5.85038e-28	0.0591373
ADM	7.3126e-40	-0.285162	0.131	0.329	1.22947e-35	0.0564621
DAAM1	2.45766e-30	-0.288621	0.569	0.755	4.13206e-26	0.0536835
HEXIM1	6.61896e-38	-0.292077	0.4	0.649	1.11285e-33	0.0727272
GAPDH	5.1362e-50	-0.295679	0.999	1	8.6355e-46	0.000295679
TMSB10	2.80625e-113	-0.30603	1	0.999	4.71814e-109	-0.00030603
CALM3	1.69666e-47	-0.311379	0.857	0.937	2.85259e-43	0.0249103
HMGN2	3.74905e-36	-0.319437	0.964	0.978	6.30328e-32	0.00447212
LRRC61	1.41734e-29	-0.324306	0.735	0.868	2.38297e-25	0.0431327
INSIG1	4.59217e-45	-0.32463	0.426	0.699	7.72081e-41	0.088624
ID2	2.63135e-84	-0.326586	0.049	0.289	4.42409e-80	0.0783807
SCD	6.68188e-50	-0.333205	0.796	0.949	1.12342e-45	0.0509804
NDRG1	3.3166e-34	-0.334278	0.404	0.626	5.5762e-30	0.0742097
UBC	1.49332e-09	-0.340899	0.797	0.851	2.51072e-05	0.0184085
C4BPB	3.28205e-47	-0.354569	0.541	0.78	5.51811e-43	0.084742
MT-ND1	1.87751e-119	-0.36003	0.996	0.987	3.15666e-115	-0.00324027
THBS1	6.666e-47	-0.362865	0.447	0.704	1.12075e-42	0.0932564
LIMCH1	1.93468e-49	-0.371669	0.703	0.871	3.25278e-45	0.0624403
SDPR	2.66324e-55	-0.383089	0.283	0.553	4.4777e-51	0.103434
CST6	2.68347e-60	-0.396286	0.524	0.798	4.51172e-56	0.108582
IFIT2	1.88683e-28	-0.396684	0.235	0.435	3.17232e-24	0.0793368
KRT8	3.87711e-34	-0.398406	0.918	0.966	6.51858e-30	0.0191235
CITED2	5.9204e-51	-0.411805	0.612	0.831	9.95396e-47	0.0901852
ISG15	0.347095	-0.418666	0.731	0.733	1	0.000837333
ZNF114	1.00643e-75	-0.435155	0.222	0.535	1.6921e-71	0.136203
NNMT	2.73657e-64	-0.444388	0.363	0.673	4.601e-60	0.13776
ANKRD1	2.97478e-41	-0.454713	0.616	0.808	5.00151e-37	0.0873048
FTL	7.445e-69	-0.457432	1	1	1.25173e-64	0
TXNRD1	1.16225e-65	-0.459581	0.892	0.952	1.9541e-61	0.0275748
PEG10	1.18132e-109	-0.505079	0.259	0.648	1.98616e-105	0.196476
RHOBTB3	2.59858e-127	-0.539365	0.944	0.983	4.36898e-123	0.0210352
PPME1	7.12405e-90	-0.570121	0.416	0.737	1.19777e-85	0.183009
KRT18	3.45578e-59	-0.628034	0.965	0.981	5.81021e-55	0.0100486
HIST1H1C	7.66081e-94	-0.645472	0.491	0.804	1.28801e-89	0.202033
FST	2.8249e-119	-0.711966	0.365	0.76	4.7495e-115	0.281226
CLIC3	6.82687e-116	-0.717688	0.53	0.841	1.1478e-111	0.223201
UCP2	3.32464e-157	-0.857369	0.502	0.856	5.58972e-153	0.303508
ID1	4.57741e-208	-1.05577	0.702	0.965	7.696e-204	0.277667
ID3	8.44205e-205	-1.1483	0.562	0.93	1.41936e-200	0.422573

[truncated: 2 more sheets: Table S11, Table S12]
