# Supplementary material for: A chemical probe of CARM1 alters epigenetic plasticity against breast cancer cell invasion
Source: eLife. 2019 Oct 28;8:e47110. doi: 10.7554/eLife.47110 (PMC6917500; doi:10.7554/eLife.47110)
Supplement: Supplementary file 1. — (A) IC50 values of SAH, SNF, 1, 2a, 2b, 5a and 5b against CARM1. (B–D) Structural analysis of CARM1 in complex with 1, SNF and SAH. (E–L) Analysis of single-cell RNA-seq data. [file elife-47110-supp1.xlsx]

## Sheet: Table A
Table A. IC50 of SAH, SNF, 1, 2a, 2b, 5a and 5b
* Previously reported IC50 values (Zheng, et al., J Am Chem Soc 134, 18004-18014)
IC50/mM	Ligands
Methyltransfereases	SAH	SNF	1	2a	2b	5a	5b
BCDIN3D	0.5	3.4	0.7	3	17	13	46
METTL3-14	2	3.7	5	13	5	>50	22
DNMT1	3.2	10.5	3	7.2	>50 *	>50	>50
DNMT3B	0.21	0.18	5	>50	>50	>50	>50
DNMT3A	0.25	0.36	2	34	>50	>50	28
PRMT7	1.3	1.4	1.3	1.2	5	0.4	>50
PRMT9	25	26	27	6	>50	1	>50
PRMT5	1.1	8.2	1.2	3.7	12	2	>50
PRMT6	0.6	1.5	0.09	43	>50	>50	>50
CARM1	0.6	0.3	0.013	0.03	22 *	0.043	1.91
PRMT3	9.9	28	3.6	2.7	8 *	6	>50
PRMT8	0.5	0.7	0.03	1.3	12	>50	>50
PRMT1	9.6	6.6	0.3	>50	>50	54	>50
DOT1L	3.2	>50	10	31	15	>50	>50
PRDM9	>50	>50	>50	17	>50	>50	>50
SUV39H2	0.6	4.6	25	10.1	>50	>50	37
SUV39H1	4	13	44	39	>50	>50	19
SETDB1	1	8	19	>50	>50	>50	>50
GLP	5	32	>100	>100	>50	>50	>50
G9a	6.7	19	>100	>100	>50	>50	>50
PRC2	8	29	>50	4.7	>50 *	>50	>50
MLL3	18	13	>50	>50	>50	>50	>50
MLL1	8.3	21	>50	2.6	5 *	>50	>50
SETD2	2.9	28	>50	>50	0.5 *	50	28
ASH1L	>50	>50	>50	>50	>50	>50	>50
NSD2	>50	22	>50	>50	>50	>50	>50
NSD3	>50	21	>50	>50	>50	>50	>50
NSD1	>50	23	>50	>50	>50	>50	>50
SETD8	>100	>100	>100	>100	>50	>50	>50
SET7/9	>100	1.1	28	>50	>50	>100	>50
SUV420H1	>50	>50	>50	>50	>50	>50	>50
SUV420H2	>50	>50	>50	>50	>50	>50	>50
SMYD3	10	3	6	12	6	>50	24
SMYD2	24	0.4	0.34	0.3	5	>50	>50

## Sheet: Table B
Table B. Direct hydrogen bond interactions of 1 with the residues of CARM1 and their comparison with CARM1-SNF and CARM1-SAH complexes. The variations among the subunits of the CARM1-1 complex (4IKP) were observed for the NZ of Chain A (III and IV) and Q160 in Chain C (´A and ´B). For the CARM1-SNF complex (2Y1W) and the CARM1-SAH complex (2Y1X), there is no significant difference among individua…
	1a				SNF	SAH
	CARM1 (4IKP)				CARM1 (2Y1W)	CARM1 (2Y1X)	PRMT1 (1OR1)	PRMT3 (2FYT)
	Chain A	Chain B	Chain C	Chain D	Chain A, B, C & D	Chain A, B, C & D
NZ (1a) NE (SNF)	III E258/O(2.6) IV Y154/OH(2.9)	E258/O(2.8) E258/OE1(3.7)	E258/O(2.6) E258/OE1(3.2)	E258/O(2.6) E258/OE1(3.2)	E258/O(2.7-3.0) E258/OE1(2.9-3.0)
αN	G193/O (3.4)	G193/O(2.9)	G193/O(3.2)	G193/O(2.9)	G193/O(2.9-3.0)	G193/O(2.8-2.9)	G78/O(3.0)	G280/O(2.9)
O	R169/NH1(2.8) R169/NH2(3.6)	R169/NH1(2.7) R169/NH2(3.2)	R169/NH1(3.0) R169/NH2(3.5)	R169/NH1(2.8) R169/NH2(3.4)	R169/NH1(2.8-2.9) R169/NH2(3.3-3.5)	R169/NH1(2.8-2.9) R169/NH2(3.4-3.5)	R54/NH1(2.7) R54/NH2(3.0)	R256/NH1(2.8) R256/NH2(3.7)
OXT	Q160/NE2(3.2)	R169/NH2(2.7)	Q160/NE2´B(3.1)Q160/OG´A(3.0) Q160/OG´B(3.0)	R169/NH2(2.7)	R169/NH2(2.7-3.1)	R169/NH2(2.8-3.0)	R54/NH2(3.1)	R256/NH2(3.1)
2'OH	E215/OE2(2.8)	E215/OE2(2.6)	E215/OE2(2.7)	E215/OE2(2.7)	E215/OE2(2.6-2.9)	E215/OE2(2.7-2.8)	E100/OE2(2.7)	D302/OD1(2.8)
3'OH	E215/OE1(3.1) E215/OE2(3.1)	E215/OE1(2.8) E215/OE2(3.1) Q160/NE2(3.2)	E215/OE1(3.1) E215/OE2(3.2) Q160/NE2´A(3.5)	E215/OE1(2.8) E215/OE2(3.1) Q160/NE2(3.2)	E215/OE1(2.8-3.0) E215/OE2(3.0-3.2) Q160/NE2(3.0-3.2)	E215/OE1(2.7) E215/OE2(3.0-3.1) Q160/NE2(3.2)	E100/OE1(2.6) E100/OE2(3.0)	D302/OD1(3.5) D302/OD2(2.7)
N1	V243/N(3.1)	V243/N(3.0)	V243/N(3.1)	V243/N(3.0)	V243/N(3.0-3.1)	V243/N(3.0-3.1)	V128/N(3.3)	I330/N(2.9)
N6	S272/OG(3.4) E244/OE1(3.1)	S272/OG(3.1) E244/OE2(2.8)	S272/OG(3.4) E244/OE1(3.1)	S272/OG(3.2) E244/OE1(3.0)	S272/OG(3.2-3.4) E244/OE1(2.8-2.9)	S272/OG(3.1) E244/OE1(2.8-2.9)	T158/OG(3.8) E129/OE2(3.8)	S360/OG(3.1) E331/OE2(2.9)

## Sheet: Table C
Table C. Comparison of water hydrogen bonds of 1 and SNF in complex with human CARM1 (PDB 4IKP and 2Y1W). The key variations of the water hydrogen bonds with 1 in comparison with SNF were observed at the former’s NZ and OXT and CARM1’s Q160 region. Bond distances of Å are displayed in parenthesis and the specific interacting atoms were shown as the following: N and O for backbone nitrogen and oxy…
	1a								SNF
	CARM1 (4IKP)								CARM1 (2Y1W)
	Chain A		Chain B		Chain C		Chain D		Chain A, B, C & D
	WHB1	WHB2	WHB1	WHB2	WHB1	WHB2	WHB1	WHB2	WHB1	WHB2
NZ-1a NE-SNF	III W745(3.1)	M260/O(2.8)	W751(2.9)	Y150/OH(3.1)	W753(2.8)	M260/O(2.7)	NI		W(2.6-2.8)	S272/OG(2.8-3.3)
		E258/OE2(2.9)		E267/OE1(2.7)		E258/OE2(2.8)
	IV W745(2.7)	M260/O(2.8)
		E258/OE2(2.9)
	IV W667(3.1)	Y154/OH(3.1)
αN	W617(2.8)	D191/OD2(2.7)	W628(2.7)	D191/OD2(3.0)	W604(2.7)	D191/OD2(2.9)	W616(2.8)	D191/OD2(2.8)	W(2.6-3.0)	D191/OD1(2.8-3.0)
		V192/O(2.9)		V192/O(2.8)		V192/O(2.9)		V192/O(2.7)		V192/O(2.8-3.0)
		G193/O(2.9)		G193/O(2.8)		G193/O(3.0)		G193/O(2.8)		G193/O(2.9-3.1)
		E258/N(3.2)		E258/N(3.1)		E258/N(3.1)		E258/N(3.2)		E258/N(3.0-3.2)
	W615(2.9)	D191/OD1(2.8)	W605(2.9)	D191/OD1(2.8)	W601(2.9)	D191/OD1(2.9)	W602(3.0)	D191/OD1(2.7)	W(2.7-3.2)	D191/OD2(2.6-2.7)
		C194/O(2.6)		C194/O(2.7)		C194/O(2.7)		C194/O(2.6)		C194/O(2.5-2.8)
		L199/N(3.0)		L199/N(2.9)		L199/N(2.9)		L199/N(3.0)		L199/N(2.7-3.0)
	W784(3.2)	E258/OE1(2.8)
O	(2.9)W753		NI		NI		NI		NI
OXT	NI		W604(2.7)	S196/OG(2.7)	NI		W613(2.8)	S196/OG(2.6)	W (2.6-2.7)	S196/OG(2.6-2.8)
				S196/N(3.4)				S196/N(3.2)	(CHAIN A & D)	S196/N(3.1)
				Q160/OE1(2.8)				Q160/OE1(2.8)		Q160/OE1(2.5-2.6)
3'OH	(2.9)W777	(2.8)Y154/O	NI		NI		NI
		(2.7)Q160/OE1
N7	NI		NI		NI		NI		W(2.8-3.0)	S272/OG(2.7-3.3)

## Sheet: Table D
Table D. Water hydrogen bonds of SAH in complex with CARM1 (PDB 2Y1X). The water hydrogen bonds of SAH in complex with CARM1 are shown with the bond distances of Å in parenthesis and the specific interacting atoms as the following: N and O for backbone nitrogen and oxygen; OG for the side chain oxygen of Ser; OH for the side chain hydroxyl group of Tyr; OD1 and OD2 for the chain carbonyl oxygen a…
	SAH
	CARM1 (2Y1X)								PRMT1 (1OR1)		PRMT3 (2FYT)
	Chain A		Chain B		Chain C		Chain D
	WHB1	WHB2	WHB1	WHB2	WHB1	WHB2	WHB1	WHB2	WHB1	WHB2	WHB1	WHB2
αN	W2019(2.9)	D191/OD2(2.6) L199/N(2.8) C194/O(2.7)	W2015(2.9)	D191/OD1(2.6) V192/O(3.0) G193/O(3.1) E258/N(3.1)	W2027(2.8)	V192/O(2.8) G193/O(3.0) E258/N(3.0) C194/O(2.9)	W2020(3.0)	V192/O(2.8) G193/O(3.1) E258/N(3.1)	W373(2.8)	D76/OD2(2.6) V77/O(3.2) G78/O(3.0) E144/N(3.2)	W562(2.9)	D278/OD2(2.9) V279/O(2.8) G280/O(3.0) E346/N(2.9)
			W2016(2.8)	D191/OD2(2.8) C194/O(2.5) L199/N(2.8)	W2029(3.2)	C194/O(2.9)	W2021(2.6)	D191/OD2(3.1) C194/O(2.3) L199/N(3.1)	W372(3.0)	D76/OD1(2.7) S79/O(2.8) L84/N(3.0)	W550(2.9)	D278/OD1(2.6) C281/O(2.6) L286/N(2.8)
OXT	W2122(2.5)	S196/OG(2.7) S196/N(2.9) Q160/OE1(2.8)	W2006(3.0)	S196/OG(3.0) S196/N(3.0) Q160/OE1(2.5)	W2137(2.5)	S196/OG(2.7) S196/N(3.2) Q160/OE1(2.9)	W2022(2.8)	S196/OG(2.8) S196/N(3.0) Q160/OE1(2.8)	W374(2.4)	T81/OG1(2.9) T81/N(3.2) H45/ND1(3.0)	W552(2.8)	T283/OG1(2.8) T283/N(3.0)
N7	W2123(2.8)	S272/OG(3.3)	W2035(3.0)	S272/OG(2.8)	W2136(2.6)	S272/OG(3.0)	W2112(2.8)	S272/OG(2.8)			W582(3.0)	S360/OG(3.0) R530/NH1(2.8) R530/NH2(3.2)

## Sheet: Table E
Table E. Numbers and percentages of the cells classified by their origins and cell-cycle stages for scRNA-seq analysis.
Cell numbers		Conditions
	% of treatment	DMSO	% in DMSO	SKI-73N	% in SKI-73N	SKI-73	% in SKI-73	Total		Invasion cells
Cell cycle	G0/G1	2515	0.613564	2248	0.627407	2122	0.656559	6885		891	0.234906
	G2/M	989	0.241278	859	0.239743	661	0.204517	2509		1092	0.287899
	S	595	0.145157	476	0.13285	449	0.138923	1520		1810	0.477195
	Total	4099		3583		3232		10914		3793

## Sheet: Table F
Table F. Population analysis of G0/G1-phase cells treated with DMSO, SKI-73N and SKI-73
6, 7, 8, 9, 14	Invasion-cell-related subpopulations uncovered via unsupervised correlation analysis
	Subpopulations	1	7	12	15	0	2	8	11	13	14	17	19	3	5	6	4	16	10	18	20	9		Total
Cell numbers/treatment	DMSO	209	125	85	64	328	258	205	159	145	101	56	38	178	140	117	35	1	128	32	13	98		2515
	SKI-73N	193	117	91	76	386	217	103	103	71	103	36	23	151	135	123	35	1	99	25	33	127		2248
	SKI73	202	123	77	62	67	67	52	51	35	37	20	14	182	147	159	410	168	101	23	9	116		2122
% within each treatment	DMSO%	0.0831014	0.0497018	0.0337972	0.0254473	0.130417	0.102584	0.0815109	0.0632207	0.0576541	0.040159	0.0222664	0.0151093	0.0707753	0.055666	0.0465209	0.0139165	0.000397614	0.0508946	0.0127237	0.00516899	0.0389662
	SKI-73N%	0.0858541	0.0520463	0.0404804	0.0338078	0.171708	0.0965302	0.0458185	0.0458185	0.0315836	0.0458185	0.0160142	0.0102313	0.0671708	0.0600534	0.0547153	0.0155694	0.00044484	0.0440391	0.011121	0.0146797	0.0564947
	SKI-73%	0.0951932	0.0579642	0.0362865	0.0292177	0.031574	0.031574	0.0245052	0.0240339	0.0164939	0.0174364	0.00942507	0.00659755	0.0857681	0.0692743	0.0749293	0.193214	0.0791706	0.0475966	0.0108388	0.00424128	0.0546654
																*
Depleted	SKI-73N/DMSO	0.923445	0.936	1.07059	1.1875	1.17683	0.841085	0.502439	0.647799	0.489655	1.0198	0.642857	0.605263	0.848315	0.964286	1.05128	1	1	0.773438	0.78125	2.53846	1.29592
Emerging	SKI-73/DMSO	1.14551	1.16624	1.07365	1.14817	0.242099	0.307785	0.300637	0.380159	0.286083	0.434183	0.423287	0.436654	1.21184	1.24446	1.61066	13.8838	199.114	0.935199	0.851864	0.820525	1.40289
	Classified categories	Commonly resistant				Differentially depleted---SKI-73-specific								Differentially emerging---SKI-73-specific					Differentially depleted---SKI-73N-specific		Differentially emerging---SKI-73N-specific	Commonly emerging

## Sheet: Table G
Table G. Population analysis of S-phase cells treated with DMSO, SKI-73N and SKI-73
0, 3	Invasion-cell-related subpopulations uncovered via unsupervised correlation analysis
	Subpopulations	2	4	5	3	6	0	1		Total
Cell numbers/treatment	DMSO	103	65	29	106	7	156	129		595
	SKI-73N	86	51	24	70	6	100	139		476
	SKI-73	86	54	25	51	10	119	104		449
% within each treatment	DMSO%	0.173109	0.109244	0.0487395	0.178151	0.0117647	0.262185	0.216807
	SKI-73N%	0.180672	0.107143	0.0504202	0.147059	0.012605	0.210084	0.292017
	SKI-73%	0.191537	0.120267	0.0556793	0.113586	0.0222717	0.265033	0.231626
Depleted	SKI-73N/DMSO	1.04369	0.980769	1.03448	0.825472	1.07143	0.801282	1.3469
Emerging	SKI-73/DMSO	1.10645	1.10091	1.14239	0.63758	1.8931	1.01086	1.06835
	Classified categories	Commonly resistant			Differentially depleted---SKI-73-specific	Differentially emerging---SKI-73-specific	Differentially depleted---SKI-73N-specific	Differentially emerging---SKI-73N-specific

## Sheet: Table H
Table H. Population analysis of G2/M-phase cells treated with DMSO, SKI-73N and SKI-73
1, 2	Invasion-cell-related subpopulations uncovered via unsupervised correlation analysis
	Subpopulations	1	2	3	0	5	4		Total
Cell numbers	DMSO	249	259	191	225	25	40		989
	SKI-73N	228	168	127	270	32	34		859
	SKI-73	181	125	100	194	28	33		661
% within each treatment	DMSO%	0.251769	0.261881	0.193124	0.227503	0.0252781	0.0404449
	SKI-73N%	0.265425	0.195576	0.147846	0.314319	0.0372526	0.0395809
	SKI-73%	0.273828	0.189107	0.151286	0.293495	0.0423601	0.0499244
Depleted	SKI-73N/DMSO	1.05424	0.746814	0.76555	1.38161	1.47371	0.978638
Emerging	SKI-73/DMSO	1.08761	0.722113	0.78336	1.29007	1.67576	1.23438
	Classified categories	Commonly resistant	Commonly depleted		Commonly emerging		Differentially emerging---SKI-73-specific

## Sheet: Table I
Table I. Differential gene expression of G0/G1-phase “invasion cells” and the cells treated with DMSO, SKI-73 and SKI-73N
Top 20 upregulated transcripts in invasion or invasion-prone cells with implicated cancer relevance
Top 10 downregulated transcripts in invasion or invasion-prone cells with implicated cancer relevance
	p_val	avg_logFC	pct.1	pct.2	p_val_adj	score
PTTG1	0	1.12876	0.725	0.311	0	0.467307
TUBA1B	0	0.865011	0.917	0.671	0	0.212793
H2AFZ	0	0.852214	0.979	0.912	0	0.0570983
STMN1	0	0.822869	0.933	0.719	0	0.176094
HMGN2	0	0.811228	0.955	0.808	0	0.119251
UBE2S	8.49761e-242	0.792375	0.605	0.283	1.54138e-237	0.255145
CKS1B	1.01708e-299	0.780489	0.813	0.527	1.84488e-295	0.22322
CDKN3	0	0.75642	0.598	0.2	0	0.301055
DKK1	1.69829e-168	0.709919	0.852	0.664	3.08053e-164	0.133465
HMGB1	0	0.660139	0.973	0.848	0	0.0825174
CYR61	8.03024e-195	0.657255	0.911	0.774	1.45661e-190	0.090044
G0S2	2.31428e-37	0.645333	0.585	0.459	4.19787e-33	0.081312
HMGA1	2.61418e-244	0.596743	0.901	0.646	4.74187e-240	0.152169
TNFRSF12A	4.40649e-259	0.596336	0.871	0.608	7.99293e-255	0.156836
LSM5	9.31905e-283	0.569448	0.907	0.71	1.69038e-278	0.112181
HNRNPA2B1	0	0.560004	0.983	0.894	0	0.0498404
SNRPB	6.06744e-292	0.555162	0.915	0.697	1.10057e-287	0.121025
PRKCDBP	7.26801e-252	0.545794	0.883	0.651	1.31834e-247	0.126624
SMS	2.28793e-206	0.541934	0.829	0.62	4.15007e-202	0.113264
RAN	2.41473e-282	0.540106	0.959	0.847	4.38008e-278	0.0604919
HSP90AA1	0	0.538238	0.985	0.931	0	0.0290648
CTGF	1.19984e-131	0.532947	0.69	0.453	2.17638e-127	0.126309
ANKRD1	6.47669e-130	0.528036	0.73	0.501	1.17481e-125	0.12092
PHLDA2	2.33583e-190	0.525114	0.872	0.652	4.23696e-186	0.115525
CCND1	1.00568e-213	0.523707	0.929	0.725	1.8242e-209	0.106836
SNRPD1	4.54555e-247	0.515821	0.916	0.757	8.24518e-243	0.0820155
SRM	1.09149e-239	0.51486	0.827	0.558	1.97985e-235	0.138497
SNRPG	2.06897e-299	0.512861	0.966	0.863	3.7529e-295	0.0528247
RANBP1	3.37344e-237	0.507946	0.836	0.579	6.11909e-233	0.130542
KIAA0101	1.49402e-202	0.499045	0.519	0.201	2.71e-198	0.158696
PPP1R14B	1.52946e-216	0.496298	0.905	0.744	2.77428e-212	0.079904
MT2A	1.69738e-153	0.493426	0.956	0.858	3.07888e-149	0.0483558
C12ORF75	1.61678e-223	0.491613	0.827	0.544	2.93268e-219	0.139126
CYCS	6.43985e-212	0.490556	0.847	0.625	1.16812e-207	0.108903
EBNA1BP2	2.11142e-215	0.490406	0.732	0.437	3.8299e-211	0.14467
H2AFV	1.90566e-261	0.485448	0.957	0.848	3.45668e-257	0.0529138
UCP2	6.06501e-91	0.48287	0.633	0.445	1.10013e-86	0.0907796
PRELID1	0	0.479263	0.984	0.911	0	0.0349862
F3	1.26698e-132	0.477444	0.787	0.591	2.29817e-128	0.0935789
DTYMK	3.3027e-206	0.474393	0.603	0.29	5.99076e-202	0.148485
MYEOV	5.03545e-182	0.468759	0.608	0.31	9.13379e-178	0.13969
HNRNPAB	1.02795e-192	0.46857	0.644	0.343	1.8646e-188	0.141039
CENPW	8.18969e-289	0.465234	0.458	0.103	1.48553e-284	0.165158
PSMA7	1.67512e-291	0.459859	0.995	0.969	3.03849e-287	0.0119563
NME1	3.39053e-209	0.458749	0.899	0.686	6.15009e-205	0.0977135
TK1	2.11984e-266	0.457706	0.489	0.136	3.84518e-262	0.16157
HMGN1	2.195e-250	0.454254	0.977	0.923	3.98151e-246	0.0245297
HN1	3.45915e-200	0.451455	0.924	0.793	6.27454e-196	0.0591406
PHF19	4.26063e-198	0.431163	0.435	0.145	7.72835e-194	0.125037
DRAP1	1.43012e-206	0.426974	0.971	0.885	2.5941e-202	0.0367197
CCT5	1.03714e-173	0.426844	0.73	0.453	1.88127e-169	0.118236
BIRC5	1.62712e-215	0.422336	0.41	0.113	2.95144e-211	0.125434
HSPD1	2.82355e-167	0.420045	0.834	0.62	5.12164e-163	0.0898896
FOSL1	1.2958e-136	0.416498	0.472	0.222	2.35045e-132	0.104124
FST	3.3259e-62	0.414196	0.491	0.316	6.03285e-58	0.0724843
ITGB1BP1	2.74325e-171	0.40637	0.859	0.676	4.97598e-167	0.0743656
HSPE1	2.29257e-214	0.405574	0.97	0.903	4.1585e-210	0.0271734
OGFRL1	6.21643e-140	0.400689	0.712	0.466	1.1276e-135	0.0985696
TUBA1C	2.05398e-119	0.400358	0.653	0.428	3.72571e-115	0.0900804
C1QBP	2.1229e-180	0.400111	0.922	0.783	3.85072e-176	0.0556154
LSM4	1.43059e-183	0.399843	0.91	0.733	2.59494e-179	0.0707722
DDX21	8.87067e-131	0.396427	0.635	0.389	1.60905e-126	0.097521
BANF1	7.32691e-211	0.396077	0.962	0.874	1.32903e-206	0.0348547
COTL1	7.37947e-159	0.386533	0.882	0.694	1.33856e-154	0.0726681
TMEM14B	2.85665e-189	0.383827	0.983	0.939	5.18167e-185	0.0168884
PTMA	4.14789e-249	0.383658	1	0.998	7.52386e-245	0.000767317
SERPINE1	2.2362e-66	0.383642	0.385	0.216	4.05624e-62	0.0648355
ARPC2	9.49235e-212	0.382849	0.978	0.917	1.72182e-207	0.0233538
HMGB3	1.42396e-169	0.381555	0.439	0.164	2.58292e-165	0.104928
TOMM40	1.62982e-142	0.379764	0.575	0.313	2.95632e-138	0.0994981
DEK	3.4434e-133	0.371508	0.93	0.858	6.24598e-129	0.0267486
PPME1	8.3346e-95	0.369014	0.494	0.285	1.51181e-90	0.0771239
CALM2	2.10567e-216	0.366652	0.997	0.992	3.81947e-212	0.00183326
NCL	1.2251e-113	0.365074	0.827	0.688	2.22221e-109	0.0507453
PSMB1	1.54563e-143	0.363701	0.95	0.859	2.80362e-139	0.0330967
PDCD5	1.41838e-148	0.36169	0.92	0.808	2.57281e-144	0.0405092
PFN1	2.20162e-292	0.361448	0.999	0.997	3.99352e-288	0.000722896
LSM3	1.37046e-160	0.358492	0.928	0.816	2.48588e-156	0.0401511
RPL39L	1.09749e-129	0.357265	0.552	0.297	1.99073e-125	0.0911025
HNRNPA3	1.42542e-134	0.355671	0.834	0.662	2.58557e-130	0.0611754
HNRNPM	1.858e-140	0.35504	0.665	0.392	3.37023e-136	0.0969259
PSMD2	4.17114e-128	0.35446	0.752	0.524	7.56603e-124	0.0808168
AP1M2	1.3333e-120	0.354336	0.596	0.356	2.41848e-116	0.0850407
TYMS	9.11613e-170	0.353248	0.385	0.121	1.65358e-165	0.0932575
PSMB7	2.77458e-123	0.349532	0.874	0.733	5.03281e-119	0.049284
EIF1AX	1.78007e-127	0.349235	0.879	0.74	3.22886e-123	0.0485437
MTDH	1.17796e-155	0.346456	0.972	0.91	2.13671e-151	0.0214803
CENPF	2.57169e-99	0.34624	0.335	0.142	4.6648e-95	0.0668244
LRRC59	9.43031e-119	0.345636	0.653	0.425	1.71056e-114	0.0788051
ATP5G1	4.00202e-139	0.345003	0.889	0.762	7.25926e-135	0.0438153
TPM3	3.37985e-144	0.342423	0.905	0.749	6.1307e-140	0.053418
NHP2	1.4038e-138	0.34228	0.905	0.765	2.54636e-134	0.0479191
SRSF7	1.59499e-110	0.342252	0.795	0.628	2.89316e-106	0.057156
SSRP1	1.93142e-128	0.341751	0.65	0.402	3.50341e-124	0.0847542
LMNA	6.87338e-123	0.341093	0.955	0.865	1.24676e-118	0.0306983
ODC1	2.14866e-180	0.34094	0.369	0.105	3.89745e-176	0.0900082
SKA2	1.25974e-122	0.340028	0.772	0.578	2.28504e-118	0.0659654
AURKAIP1	7.91894e-131	0.339856	0.905	0.805	1.43642e-126	0.0339856
CCT6A	1.48062e-116	0.339266	0.715	0.507	2.68569e-112	0.0705673
NDUFS6	2.96416e-141	0.339177	0.915	0.777	5.37669e-137	0.0468064
TPM4	3.50463e-121	0.336535	0.892	0.763	6.35704e-117	0.043413
GTF2A2	3.06015e-121	0.335384	0.807	0.627	5.55082e-117	0.0603692
HPCAL1	1.57095e-103	0.335069	0.827	0.657	2.84954e-99	0.0569618
EEF1E1	5.72071e-119	0.334835	0.625	0.388	1.03768e-114	0.0793559
PSMA4	8.75482e-111	0.329685	0.797	0.609	1.58804e-106	0.0619808
MT1E	1.82135e-63	0.32879	0.673	0.509	3.30375e-59	0.0539216
SLIRP	1.95065e-125	0.32838	0.895	0.763	3.53828e-121	0.0433461
BOLA3	4.77927e-120	0.328378	0.671	0.436	8.66911e-116	0.0771689
POLD2	1.47048e-119	0.327476	0.737	0.526	2.6673e-115	0.0690974
C17ORF89	3.82914e-128	0.325998	0.863	0.703	6.94567e-124	0.0521597
ARHGAP29	1.91944e-68	0.325542	0.792	0.663	3.48168e-64	0.0419949
SNRPF	6.6654e-111	0.325507	0.812	0.641	1.20904e-106	0.0556617
NOP16	1.84989e-123	0.323555	0.449	0.208	3.35551e-119	0.0779766
HRAS	1.79433e-113	0.322451	0.797	0.611	3.25473e-109	0.0599759
NUCKS1	6.47429e-99	0.322262	0.927	0.871	1.17437e-94	0.0180467
CCDC85B	1.8898e-129	0.322127	0.981	0.927	3.4279e-125	0.0173949
PFDN2	1.72084e-99	0.321102	0.835	0.705	3.12144e-95	0.0417432
PPM1G	3.60282e-103	0.319511	0.586	0.371	6.53516e-99	0.0686949
PDAP1	9.29212e-112	0.319058	0.813	0.63	1.6855e-107	0.0583876
RHEB	3.1426e-108	0.317317	0.97	0.931	5.70036e-104	0.0123754
SEPT7	1.08966e-115	0.316788	0.905	0.79	1.97654e-111	0.0364306
ERH	4.72947e-117	0.316687	0.883	0.756	8.57878e-113	0.0402193
HNRNPR	2.40882e-108	0.315958	0.673	0.458	4.36935e-104	0.067931
PSMB3	1.05145e-119	0.315814	0.903	0.779	1.90722e-115	0.0391609
PSMB6	3.46913e-120	0.315417	0.913	0.805	6.29266e-116	0.0340651
ZNF706	8.84753e-87	0.315043	0.904	0.81	1.60485e-82	0.029614
EIF6	3.34277e-86	0.313764	0.822	0.671	6.06345e-82	0.0473784
WDR1	2.55736e-110	0.312305	0.851	0.676	4.6388e-106	0.0546533
LSM7	1.26663e-107	0.311478	0.797	0.62	2.29755e-103	0.0551316
TIMM13	3.70858e-116	0.310991	0.92	0.817	6.72699e-112	0.0320321
GADD45GIP1	2.2659e-119	0.31016	0.944	0.86	4.11011e-115	0.0260534
CYC1	7.38889e-98	0.309701	0.853	0.727	1.34027e-93	0.0390223
IFRD2	4.83501e-112	0.309207	0.567	0.329	8.77022e-108	0.0735913
TARS	1.14832e-80	0.308645	0.678	0.492	2.08295e-76	0.0574081
MRPL14	5.06598e-134	0.307995	0.982	0.933	9.18919e-130	0.0150917
HSP90AB1	6.09928e-97	0.307657	0.976	0.937	1.10635e-92	0.0119986
ANXA2	2.26767e-142	0.307137	0.997	0.981	4.11332e-138	0.0049142
RPL22L1	7.48484e-69	0.306659	0.631	0.465	1.35768e-64	0.0509053
GLRX5	6.25054e-100	0.306185	0.711	0.515	1.13379e-95	0.0600123
ITGAE	3.89453e-98	0.306023	0.781	0.604	7.06428e-94	0.054166
ANP32B	1.12013e-88	0.305888	0.81	0.669	2.0318e-84	0.0431303
HDGF	4.82995e-100	0.304745	0.767	0.578	8.76105e-96	0.0575968
TUBB4B	2.20221e-79	0.304037	0.755	0.578	3.99459e-75	0.0538145
TAF9	1.26243e-92	0.304012	0.791	0.628	2.28993e-88	0.049554
UBB	4.83879e-137	0.302779	0.987	0.959	8.77707e-133	0.00847782
MTCH2	3.20862e-98	0.302031	0.739	0.559	5.82011e-94	0.0543655
PHB	7.98561e-108	0.301413	0.837	0.679	1.44851e-103	0.0476232
PSMA5	1.15977e-89	0.300199	0.753	0.576	2.1037e-85	0.0531353
NPM3	8.91841e-108	0.300127	0.517	0.289	1.61771e-103	0.0684289
SRSF9	6.04151e-106	0.299285	0.898	0.794	1.09587e-101	0.0311256
DCUN1D5	4.95588e-91	0.298716	0.638	0.439	8.98947e-87	0.0594444
ARL6IP1	4.327e-39	0.29685	0.503	0.386	7.84875e-35	0.0347314
RUVBL2	1.8658e-100	0.2964	0.514	0.293	3.38438e-96	0.0655044
SET	6.17798e-106	0.296079	0.959	0.912	1.12062e-101	0.0139157
CHCHD2	2.32179e-207	0.294817	0.996	0.989	4.21149e-203	0.00206372
CDC42EP3	3.46722e-71	0.294526	0.794	0.654	6.28919e-67	0.0412337
RPSA	4.23839e-136	0.294013	0.994	0.974	7.68801e-132	0.00588025
SLC25A5	2.52777e-84	0.293614	0.889	0.794	4.58512e-80	0.0278933
EIF4G2	1.40939e-93	0.293089	0.878	0.756	2.5565e-89	0.0357569
SSBP1	9.08263e-116	0.292995	0.946	0.855	1.6475e-111	0.0266626
GNL3	2.97485e-94	0.292248	0.579	0.36	5.39608e-90	0.0640023
CFL1	3.79729e-208	0.290658	1	0.999	6.8879e-204	0.000290658
C20ORF27	3.33728e-83	0.28895	0.633	0.444	6.05349e-79	0.0546116
DNAJB6	3.14524e-89	0.288356	0.896	0.773	5.70514e-85	0.0354677
YBX1	8.3887e-138	0.287595	0.997	0.989	1.52163e-133	0.00230076
CLTB	2.39231e-95	0.287445	0.65	0.439	4.33941e-91	0.0606508
STRA13	8.63492e-87	0.287154	0.694	0.501	1.56629e-82	0.0554208
TGM2	9.03986e-52	0.28686	0.802	0.689	1.63974e-47	0.0324152
AXL	1.45108e-82	0.286396	0.913	0.797	2.63212e-78	0.0332219
SURF4	6.12755e-90	0.286358	0.764	0.579	1.11148e-85	0.0529762
PSMD8	5.04749e-102	0.286113	0.886	0.757	9.15565e-98	0.0369086
PTRF	4.58296e-102	0.285836	0.912	0.799	8.31303e-98	0.0322995
RRBP1	1.17243e-91	0.285434	0.866	0.732	2.12668e-87	0.0382481
SERBP1	1.41311e-93	0.285228	0.866	0.73	2.56325e-89	0.038791
EIF4EBP1	2.69678e-84	0.284968	0.605	0.405	4.89169e-80	0.0569937
DUT	7.97367e-77	0.282447	0.589	0.395	1.44634e-72	0.0547946
MCFD2	1.69242e-78	0.280721	0.844	0.719	3.06988e-74	0.0350901
EIF4G1	4.97068e-89	0.280201	0.757	0.579	9.01632e-85	0.0498757
SUB1	4.09858e-129	0.279584	0.977	0.933	7.43441e-125	0.0123017
SNRPE	3.53851e-113	0.279448	0.959	0.902	6.4185e-109	0.0159286
PAWR	8.2503e-71	0.277985	0.606	0.425	1.49652e-66	0.0503152
TROAP	1.32655e-158	0.276434	0.307	0.076	2.40623e-154	0.0638563
ACTN1	1.61781e-68	0.275852	0.742	0.579	2.93454e-64	0.0449639
FDPS	5.54962e-57	0.275514	0.726	0.595	1.00665e-52	0.0360923
HNRNPH3	1.91535e-80	0.275046	0.615	0.421	3.47425e-76	0.053359
RPA3	5.90887e-76	0.274489	0.712	0.543	1.07181e-71	0.0463886
DNMT1	9.77875e-82	0.274424	0.49	0.294	1.77377e-77	0.0537871
MRPL51	1.86554e-110	0.274291	0.951	0.852	3.3839e-106	0.0271548
UQCRFS1	2.27111e-88	0.274162	0.883	0.781	4.11957e-84	0.0279645
DAZAP1	3.39984e-107	0.273888	0.439	0.214	6.16697e-103	0.0616248
YWHAB	2.92515e-140	0.273517	0.99	0.96	5.30594e-136	0.0082055
CTNNAL1	1.12634e-96	0.273478	0.953	0.879	2.04307e-92	0.0202374
RAC1	6.10373e-106	0.273432	0.983	0.954	1.10716e-101	0.00792953
H2AFY	4.25057e-87	0.27332	0.864	0.729	7.71012e-83	0.0368982
MRPL36	7.12165e-85	0.273075	0.876	0.778	1.2918e-80	0.0267614
STOML2	3.02146e-93	0.272846	0.874	0.747	5.48062e-89	0.0346514
SIVA1	4.46793e-78	0.272836	0.807	0.688	8.10438e-74	0.0324675
POMP	9.3548e-122	0.272755	0.977	0.928	1.69687e-117	0.013365
MRPL52	9.81858e-77	0.272204	0.737	0.571	1.78099e-72	0.0451858
EI24	3.26161e-90	0.272038	0.885	0.763	5.91624e-86	0.0331886
CENPM	2.038e-159	0.271825	0.297	0.072	3.69673e-155	0.0611607
PSMB2	2.70489e-74	0.271646	0.761	0.599	4.90641e-70	0.0440067
COA4	3.0022e-86	0.270843	0.858	0.731	5.44569e-82	0.0343971
HNRNPD	3.65302e-83	0.270298	0.712	0.528	6.62622e-79	0.0497348
LYAR	7.77904e-81	0.27026	0.466	0.268	1.41104e-76	0.0535114
PGAM1	7.28965e-82	0.2702	0.967	0.922	1.32227e-77	0.012159
PRDX1	2.52304e-89	0.270198	0.967	0.918	4.57655e-85	0.0132397
RPS19BP1	4.36533e-81	0.269245	0.781	0.619	7.91828e-77	0.0436176
ABCE1	5.19032e-90	0.269205	0.465	0.254	9.41471e-86	0.0568022
UQCC2	4.8478e-78	0.269084	0.73	0.537	8.79343e-74	0.0519332
UBE2N	9.50808e-81	0.268919	0.669	0.483	1.72467e-76	0.0500189
CMSS1	7.14187e-103	0.268583	0.468	0.238	1.29546e-98	0.0617742
ACTN4	1.11259e-86	0.268415	0.891	0.763	2.01812e-82	0.0343571
PA2G4	2.28388e-81	0.267851	0.553	0.356	4.14273e-77	0.0527666
POLR2F	3.2778e-84	0.26783	0.821	0.686	5.9456e-80	0.0361571
ENY2	5.13188e-100	0.267786	0.959	0.906	9.30872e-96	0.0141927
YWHAZ	5.14381e-95	0.267548	0.971	0.924	9.33035e-91	0.0125747
RPL7L1	5.05948e-88	0.267441	0.918	0.837	9.17739e-84	0.0216627
EIF5A	9.05382e-93	0.266671	0.706	0.506	1.64227e-88	0.0533343
AP2S1	8.56579e-107	0.266547	0.97	0.927	1.55375e-102	0.0114615
MRPL11	7.96824e-85	0.264593	0.808	0.673	1.44536e-80	0.0357201
CALM1	3.00764e-86	0.26278	0.942	0.849	5.45556e-82	0.0244385
FAM136A	1.06268e-77	0.262742	0.623	0.437	1.9276e-73	0.04887
ANP32E	2.42481e-80	0.262468	0.429	0.237	4.39836e-76	0.0503939
LMNB2	2.17007e-114	0.261977	0.357	0.14	3.93629e-110	0.0568491
HNRNPK	5.43484e-92	0.261808	0.906	0.804	9.85826e-88	0.0267044
LSM10	3.47492e-81	0.26173	0.526	0.324	6.30316e-77	0.0528695
SNRPC	1.20036e-86	0.261627	0.905	0.814	2.17733e-82	0.0238081
TUBB6	1.45902e-73	0.261333	0.588	0.402	2.64651e-69	0.048608
PSMD11	3.14228e-76	0.260532	0.588	0.398	5.69977e-72	0.0495011
HBEGF	7.09477e-85	0.259942	0.35	0.163	1.28692e-80	0.0486091
NT5E	7.8326e-77	0.259599	0.525	0.322	1.42076e-72	0.0526986
PSMC5	2.02993e-76	0.259407	0.644	0.452	3.6821e-72	0.0498062
PSME2	2.10551e-59	0.259327	0.736	0.578	3.81919e-55	0.0409737
WDR34	8.89337e-74	0.258748	0.612	0.422	1.61317e-69	0.0491621
SNRPA1	2.01328e-66	0.257247	0.562	0.386	3.6519e-62	0.0452755
CACYBP	3.11524e-62	0.257106	0.77	0.639	5.65074e-58	0.0336809
PTGES3	1.68061e-69	0.25586	0.787	0.671	3.04845e-65	0.0296798
PSMA3	8.85145e-70	0.255769	0.734	0.578	1.60556e-65	0.0398999
ARHGDIA	4.49664e-75	0.255761	0.83	0.694	8.15646e-71	0.0347834
ADI1	9.74306e-69	0.254915	0.754	0.596	1.76729e-64	0.0402766
RPS26	2.01443e-122	0.254758	0.987	0.975	3.65397e-118	0.0030571
IGFBP4	9.71761e-70	0.254462	0.923	0.847	1.76268e-65	0.0193391
UBE2D2	2.75472e-67	0.254403	0.78	0.652	4.99679e-63	0.0325636
CENPN	1.6087e-141	0.253985	0.332	0.101	2.91803e-137	0.0586705
GPATCH4	1.32001e-79	0.253636	0.427	0.233	2.39436e-75	0.0492054
COX8A	5.93553e-137	0.253118	0.997	0.979	1.07665e-132	0.00455613
EIF2S2	7.73693e-81	0.252617	0.89	0.809	1.4034e-76	0.020462
CSE1L	2.24495e-93	0.252138	0.439	0.226	4.07212e-89	0.0537053
MRPL13	5.55881e-69	0.25062	0.765	0.623	1.00831e-64	0.0355881
SOX4	3.2653e-33	-0.250977	0.045	0.131	5.92292e-29	0.0215841
SH3BGRL	2.52729e-58	-0.252489	0.474	0.633	4.58425e-54	0.0401458
KRT8	1.14063e-05	-0.252907	0.941	0.912	0.206899	-0.00733429
CTSA	6.86666e-55	-0.258885	0.581	0.71	1.24554e-50	0.0333962
SLC5A3	2.05407e-40	-0.26083	0.453	0.577	3.72588e-36	0.0323429
TMEM141	3.15266e-44	-0.264621	0.659	0.751	5.71861e-40	0.0243452
IGBP1	1.9756e-71	-0.269381	0.424	0.609	3.58355e-67	0.0498356
PLA2G16	1.01284e-98	-0.273833	0.958	0.978	1.83719e-94	0.00547665
RPS4X	9.72717e-110	-0.274326	0.998	1	1.76441e-105	0.000548651
NNMT	6.41471e-37	-0.275773	0.598	0.708	1.16356e-32	0.030335
CPE	1.37578e-74	-0.278242	0.131	0.318	2.49553e-70	0.0520313
SERPINB1	2.72917e-63	-0.278273	0.635	0.754	4.95045e-59	0.0331144
CSF1	8.23457e-63	-0.284481	0.474	0.632	1.49367e-58	0.044948
PSAP	5.46198e-78	-0.288767	0.805	0.882	9.90748e-74	0.022235
EIF3E	2.67334e-91	-0.293267	0.861	0.924	4.84916e-87	0.0184758
IGFBP6	1.33173e-25	-0.297534	0.631	0.7	2.41562e-21	0.0205298
TIMP1	7.17633e-52	-0.299609	0.942	0.954	1.30171e-47	0.00359531
ABCC3	7.41555e-72	-0.303629	0.695	0.807	1.34511e-67	0.0340065
NFKBIA	2.93614e-31	-0.303934	0.503	0.603	5.32587e-27	0.0303934
TPD52L1	1.23851e-82	-0.305717	0.193	0.394	2.24653e-78	0.0614491
NUPR1	9.91586e-78	-0.321888	0.091	0.27	1.79864e-73	0.057618
MRPS6	1.27597e-73	-0.322857	0.874	0.918	2.31447e-69	0.0142057
DDIT4	7.97023e-91	-0.326156	0.635	0.84	1.44572e-86	0.066862
PNRC1	2.5023e-103	-0.339879	0.435	0.656	4.53892e-99	0.0751133
TIMP3	7.09966e-69	-0.341608	0.75	0.852	1.28781e-64	0.034844
LY6E	2.57676e-101	-0.353993	0.953	0.956	4.67398e-97	0.00106198
TKT	1.97975e-83	-0.354693	0.885	0.919	3.59106e-79	0.0120596
CPD	5.42289e-93	-0.356661	0.395	0.606	9.83658e-89	0.0752554
EDIL3	3.41586e-108	-0.356803	0.513	0.718	6.19602e-104	0.0731447
EEF1A1	4.29305e-253	-0.365181	1	1	7.78717e-249	0
RARRES2	1.51384e-115	-0.371657	0.893	0.943	2.74596e-111	0.0185828
CTSD	1.4795e-173	-0.375277	0.993	0.997	2.68366e-169	0.00150111
ID3	6.42665e-88	-0.38114	0.719	0.886	1.16573e-83	0.0636503
JUNB	5.13731e-88	-0.382444	0.235	0.45	9.31856e-84	0.0822255
SCD	5.39329e-142	-0.389136	0.913	0.965	9.78289e-138	0.0202351
IFIT1	1.11594e-14	-0.390555	0.188	0.259	2.0242e-10	0.0277294
CLIC3	8.0591e-86	-0.401836	0.76	0.871	1.46184e-81	0.0446038
CYP1B1	1.03337e-66	-0.402898	0.589	0.743	1.87443e-62	0.0620463
FTH1	2.02547e-239	-0.406741	1	1	3.674e-235	0
RARRES3	8.28941e-67	-0.421672	0.63	0.751	1.50362e-62	0.0510223
FTL	1.77028e-185	-0.42577	1	1	3.21112e-181	0
ADIRF	1.82033e-98	-0.434697	0.718	0.849	3.3019e-94	0.0569453
IFIT3	1.26765e-09	-0.448763	0.219	0.276	2.29939e-05	0.0255795
SAT1	3.28045e-71	-0.449553	0.568	0.709	5.95041e-67	0.0633869
IFIT2	2.80332e-35	-0.455131	0.29	0.417	5.08495e-31	0.0578016
BAG1	2.08414e-185	-0.532394	0.716	0.872	3.78041e-181	0.0830534
IFITM3	9.16426e-235	-0.539511	0.943	0.973	1.66231e-230	0.0161853
TXNIP	1.86104e-168	-0.559545	0.58	0.804	3.37574e-164	0.125338
TNFSF10	3.74081e-149	-0.567883	0.296	0.579	6.78545e-145	0.160711
MALAT1	0	-0.662649	0.999	1	0	0.000662649
NEAT1	0	-0.677903	0.987	0.998	0	0.00745694
UBC	8.19568e-93	-0.685119	0.842	0.88	1.48661e-88	0.0260345
KRT18	2.01026e-60	-0.695771	0.969	0.96	3.64642e-56	-0.00626194
BTG1	4.05697e-294	-0.725125	0.813	0.955	7.35894e-290	0.102968
FN1	1.27322e-253	-0.82424	0.591	0.853	2.30949e-249	0.215951
ISG15	1.15927e-06	-0.889258	0.736	0.67	0.0210281	-0.058691

## Sheet: Table J
Table J. Differential gene expression of S-phase “invasion cells” and the cells treated with DMSO, SKI-73 and SKI-73N
	p_val	avg_logFC	pct.1	pct.2	p_val_adj	score
G0S2	1.92092e-152	1.409	0.865	0.601	3.22965e-148	0.371977
SERPINE1	3.89232e-94	0.669535	0.701	0.355	6.54416e-90	0.231659
CD74	1.62272e-100	0.648454	0.79	0.508	2.72828e-96	0.182864
TGM2	8.92527e-100	0.624527	0.927	0.81	1.50061e-95	0.0730696
MORC4	7.03296e-105	0.610733	0.832	0.602	1.18245e-100	0.140469
S100A2	6.64057e-69	0.592583	0.89	0.78	1.11648e-64	0.0651841
RPL10	3.66704e-186	0.562158	1	0.999	6.1654e-182	0.000562158
ZFP36L1	1.92623e-69	0.514771	0.816	0.625	3.23858e-65	0.0983213
CYP1B1	2.34282e-32	0.514567	0.565	0.393	3.93899e-28	0.0885055
BEX3	7.14134e-102	0.4708	0.978	0.95	1.20067e-97	0.0131824
RPL39	2.71295e-185	0.462168	1	1	4.56129e-181	0
CD44	7.1076e-84	0.447441	0.946	0.868	1.195e-79	0.0349004
ZNF706	6.42212e-78	0.439856	0.949	0.898	1.07975e-73	0.0224326
PLAT	7.358e-53	0.430361	0.48	0.221	1.2371e-48	0.111464
PSME2	1.95491e-62	0.413738	0.795	0.623	3.28679e-58	0.071163
PLP2	1.44602e-96	0.411516	0.993	0.963	2.43119e-92	0.0123455
TMEM14B	5.77409e-102	0.407742	0.995	0.976	9.70798e-98	0.00774709
IFI27	1.99575e-52	0.407712	0.894	0.801	3.35546e-48	0.0379172
DCBLD2	8.14991e-55	0.405504	0.801	0.673	1.37024e-50	0.0519045
CDCP1	2.08295e-61	0.401253	0.664	0.431	3.50206e-57	0.0934918
ARHGAP29	5.23192e-48	0.391243	0.894	0.817	8.79643e-44	0.0301257
MYEOV	6.74e-49	0.390255	0.762	0.627	1.1332e-44	0.0526844
TIMM8A	9.22761e-57	0.390252	0.652	0.416	1.55144e-52	0.0920995
TSC22D1	1.34044e-43	0.387	0.617	0.425	2.25369e-39	0.0743039
C15ORF48	1.95851e-45	0.385553	0.909	0.792	3.29285e-41	0.0451097
HLA-B	4.67564e-43	0.383027	0.927	0.887	7.86116e-39	0.0153211
LINC00704	3.4481e-50	0.375636	0.376	0.122	5.79729e-46	0.0954116
SSR4	1.2958e-67	0.373751	0.869	0.741	2.17862e-63	0.0478401
TMEM158	9.99925e-51	0.371665	0.535	0.296	1.68117e-46	0.0888279
HMGA1	8.33243e-39	0.366585	0.962	0.943	1.40093e-34	0.00696511
RARRES3	9.03898e-35	0.352116	0.608	0.407	1.51972e-30	0.0707753
PHLDA2	1.28891e-57	0.351763	0.955	0.915	2.16704e-53	0.0140705
EIF6	2.4828e-44	0.345944	0.908	0.826	4.17433e-40	0.0283674
NAMPT	7.72891e-46	0.337854	0.793	0.67	1.29946e-41	0.0415561
LGALS3	1.71647e-38	0.337552	0.886	0.818	2.8859e-34	0.0229536
RPL22L1	1.78459e-36	0.336729	0.776	0.634	3.00043e-32	0.0478154
LAGE3	1.60272e-50	0.335523	0.791	0.645	2.69465e-46	0.0489863
ADGRF5	1.6171e-45	0.333824	0.38	0.141	2.71883e-41	0.079784
HBEGF	2.56217e-37	0.332988	0.494	0.292	4.30777e-33	0.0672636
CDA	1.1539e-30	0.331934	0.58	0.412	1.94006e-26	0.0557649
S100A16	9.59479e-56	0.331762	0.971	0.934	1.61317e-51	0.0122752
CEMIP	1.53878e-30	0.329505	0.429	0.241	2.58715e-26	0.061947
TM4SF1	1.65495e-35	0.328323	0.693	0.545	2.78247e-31	0.0485918
MORF4L2	1.72626e-49	0.327759	0.783	0.623	2.90236e-45	0.0524414
HLA-A	1.85327e-48	0.325888	0.985	0.966	3.11591e-44	0.00619188
ARF6	7.96687e-53	0.325131	0.919	0.837	1.33947e-48	0.0266607
RBM3	8.37168e-60	0.322861	0.966	0.937	1.40753e-55	0.00936298
SLC25A5	1.40342e-48	0.321575	0.936	0.874	2.35956e-44	0.0199377
ATP2B1	1.09314e-36	0.321323	0.79	0.67	1.8379e-32	0.0385588
PSMB9	7.3573e-44	0.321288	0.567	0.342	1.23698e-39	0.0722897
C19ORF43	5.78013e-58	0.318975	0.958	0.898	9.71813e-54	0.0191385
HLA-C	7.94264e-37	0.314961	0.883	0.807	1.3354e-32	0.023937
RGS10	2.6465e-39	0.313918	0.784	0.694	4.44956e-35	0.0282526
CLIC1	5.38572e-64	0.312637	0.995	0.99	9.055e-60	0.00156318
PSMG4	3.88933e-44	0.309087	0.779	0.644	6.53913e-40	0.0417268
MCTS1	4.27566e-39	0.304737	0.659	0.5	7.18867e-35	0.0484532
NEDD8	3.51686e-65	0.303738	0.984	0.981	5.91289e-61	0.000911214
S100A11	5.14812e-83	0.303164	1	0.997	8.65553e-79	0.000909492
RBPJ	6.48373e-39	0.302136	0.841	0.769	1.09011e-34	0.0217538
B2M	2.54833e-85	0.302094	0.999	0.99	4.28452e-81	0.00271885
EBNA1BP2	1.69856e-33	0.299309	0.836	0.755	2.85579e-29	0.024244
LAMP2	1.40621e-42	0.29886	0.55	0.331	2.36427e-38	0.0654504
NDUFA1	1.62476e-45	0.294816	0.923	0.858	2.73171e-41	0.019163
ACSL5	3.66618e-39	0.291144	0.451	0.237	6.16394e-35	0.0623048
MCFD2	4.97672e-36	0.288766	0.91	0.838	8.36735e-32	0.0207912
IER3	1.77588e-27	0.288464	0.792	0.666	2.98579e-23	0.0363465
SLC9A3R2	1.613e-32	0.288213	0.811	0.736	2.71193e-28	0.0216159
HLA-E	5.6313e-38	0.287563	0.672	0.49	9.46791e-34	0.0523364
ASPH	5.12e-30	0.286511	0.547	0.391	8.60826e-26	0.0446957
RPL36AL	1.24208e-77	0.284568	0.999	0.997	2.08831e-73	0.000569136
MMP24-AS1	9.54369e-38	0.2822	0.957	0.922	1.60458e-33	0.009877
MIR4435-2HG	8.51257e-36	0.282135	0.911	0.846	1.43122e-31	0.0183388
MRPL52	5.81949e-37	0.279351	0.816	0.745	9.78431e-33	0.0198339
FAM127A	1.38286e-36	0.278751	0.636	0.475	2.32501e-32	0.0448789
RPS29	8.2867e-71	0.27761	0.999	0.995	1.39324e-66	0.00111044
SMURF2	1.48559e-31	0.276478	0.822	0.694	2.49773e-27	0.0353891
TMEM14C	8.34219e-55	0.276033	0.972	0.944	1.40257e-50	0.00772893
BIRC3	9.13318e-18	0.274987	0.28	0.145	1.53556e-13	0.0371232
FLNA	7.60575e-40	0.274949	0.903	0.84	1.27875e-35	0.0173218
RPL18A	1.56334e-81	0.270495	1	0.999	2.62844e-77	0.000270495
HPCAL1	1.09065e-26	0.269613	0.889	0.845	1.83371e-22	0.011863
CYR61	2.82941e-15	0.266957	0.915	0.898	4.75709e-11	0.00453828
ITGA2	9.7455e-29	0.263473	0.438	0.268	1.63851e-24	0.0447904
NAA10	5.67993e-30	0.262078	0.67	0.542	9.54967e-26	0.033546
TIMP1	1.18047e-22	0.260661	0.935	0.913	1.98472e-18	0.00573454
PSMA5	1.34382e-23	0.259004	0.773	0.7	2.25937e-19	0.0189073
FAM127B	6.70143e-32	0.258995	0.674	0.528	1.12671e-27	0.0378133
S100A3	2.41505e-30	0.258963	0.552	0.386	4.06042e-26	0.0429879
HSPA8	7.54404e-27	0.256363	0.968	0.934	1.26838e-22	0.00871636
SLC52A2	8.24127e-28	0.253481	0.563	0.418	1.38561e-23	0.0367547
DAD1	8.64927e-35	0.252646	0.885	0.83	1.4542e-30	0.0138955
ARHGAP22	5.76951e-27	0.251862	0.407	0.239	9.70028e-23	0.0423127
PHPT1	5.21944e-43	-0.252669	0.951	0.977	8.77544e-39	0.0065694
PCBP1	3.00228e-29	-0.253652	0.86	0.934	5.04773e-25	0.0187703
FDFT1	2.74976e-33	-0.254954	0.355	0.594	4.62317e-29	0.0609341
LDHA	1.21629e-24	-0.255823	0.994	0.998	2.04495e-20	0.00102329
MT-ND2	1.13677e-67	-0.259489	0.997	0.99	1.91124e-63	-0.00181642
SURF1	4.05598e-37	-0.260451	0.464	0.694	6.81933e-33	0.0599038
PGAM1	1.21746e-35	-0.261328	0.973	0.986	2.04691e-31	0.00339727
FSTL1	5.52006e-28	-0.262204	0.462	0.671	9.28087e-24	0.0548006
SLC1A3	1.62902e-32	-0.264054	0.274	0.498	2.73887e-28	0.0591481
SPTAN1	1.07818e-35	-0.26412	0.466	0.687	1.81274e-31	0.0583705
PLAC8	2.73538e-34	-0.266794	0.808	0.926	4.599e-30	0.0314817
AP2M1	2.74721e-43	-0.27021	0.841	0.935	4.61888e-39	0.0253998
APLP2	2.70506e-39	-0.270513	0.933	0.96	4.54801e-35	0.00730384
NQO1	4.82687e-19	-0.273876	0.809	0.875	8.11542e-15	0.0180758
SET	1.65217e-44	-0.274491	0.979	0.981	2.7778e-40	0.000548981
PTS	9.81198e-28	-0.275109	0.808	0.891	1.64969e-23	0.0228341
IFIT1	1.52446e-18	-0.276422	0.105	0.225	2.56307e-14	0.0331706
CD55	3.47968e-32	-0.281606	0.513	0.723	5.85038e-28	0.0591373
ADM	7.3126e-40	-0.285162	0.131	0.329	1.22947e-35	0.0564621
DAAM1	2.45766e-30	-0.288621	0.569	0.755	4.13206e-26	0.0536835
HEXIM1	6.61896e-38	-0.292077	0.4	0.649	1.11285e-33	0.0727272
GAPDH	5.1362e-50	-0.295679	0.999	1	8.6355e-46	0.000295679
TMSB10	2.80625e-113	-0.30603	1	0.999	4.71814e-109	-0.00030603
CALM3	1.69666e-47	-0.311379	0.857	0.937	2.85259e-43	0.0249103
HMGN2	3.74905e-36	-0.319437	0.964	0.978	6.30328e-32	0.00447212
LRRC61	1.41734e-29	-0.324306	0.735	0.868	2.38297e-25	0.0431327
INSIG1	4.59217e-45	-0.32463	0.426	0.699	7.72081e-41	0.088624
ID2	2.63135e-84	-0.326586	0.049	0.289	4.42409e-80	0.0783807
SCD	6.68188e-50	-0.333205	0.796	0.949	1.12342e-45	0.0509804
NDRG1	3.3166e-34	-0.334278	0.404	0.626	5.5762e-30	0.0742097
UBC	1.49332e-09	-0.340899	0.797	0.851	2.51072e-05	0.0184085
C4BPB	3.28205e-47	-0.354569	0.541	0.78	5.51811e-43	0.084742
MT-ND1	1.87751e-119	-0.36003	0.996	0.987	3.15666e-115	-0.00324027
THBS1	6.666e-47	-0.362865	0.447	0.704	1.12075e-42	0.0932564
LIMCH1	1.93468e-49	-0.371669	0.703	0.871	3.25278e-45	0.0624403
SDPR	2.66324e-55	-0.383089	0.283	0.553	4.4777e-51	0.103434
CST6	2.68347e-60	-0.396286	0.524	0.798	4.51172e-56	0.108582
IFIT2	1.88683e-28	-0.396684	0.235	0.435	3.17232e-24	0.0793368
KRT8	3.87711e-34	-0.398406	0.918	0.966	6.51858e-30	0.0191235
CITED2	5.9204e-51	-0.411805	0.612	0.831	9.95396e-47	0.0901852
ISG15	0.347095	-0.418666	0.731	0.733	1	0.000837333
ZNF114	1.00643e-75	-0.435155	0.222	0.535	1.6921e-71	0.136203
NNMT	2.73657e-64	-0.444388	0.363	0.673	4.601e-60	0.13776
ANKRD1	2.97478e-41	-0.454713	0.616	0.808	5.00151e-37	0.0873048
FTL	7.445e-69	-0.457432	1	1	1.25173e-64	0
TXNRD1	1.16225e-65	-0.459581	0.892	0.952	1.9541e-61	0.0275748
PEG10	1.18132e-109	-0.505079	0.259	0.648	1.98616e-105	0.196476
RHOBTB3	2.59858e-127	-0.539365	0.944	0.983	4.36898e-123	0.0210352
PPME1	7.12405e-90	-0.570121	0.416	0.737	1.19777e-85	0.183009
KRT18	3.45578e-59	-0.628034	0.965	0.981	5.81021e-55	0.0100486
HIST1H1C	7.66081e-94	-0.645472	0.491	0.804	1.28801e-89	0.202033
FST	2.8249e-119	-0.711966	0.365	0.76	4.7495e-115	0.281226
CLIC3	6.82687e-116	-0.717688	0.53	0.841	1.1478e-111	0.223201
UCP2	3.32464e-157	-0.857369	0.502	0.856	5.58972e-153	0.303508
ID1	4.57741e-208	-1.05577	0.702	0.965	7.696e-204	0.277667
ID3	8.44205e-205	-1.1483	0.562	0.93	1.41936e-200	0.422573

[truncated: 2 more sheets: Table K, Table L]
