# Supplementary figures and images for: A chemical probe of CARM1 alters epigenetic plasticity against breast cancer cell invasion
Source: eLife journal article supplement (doi:10.7554/elife.47110), 2019-10-28

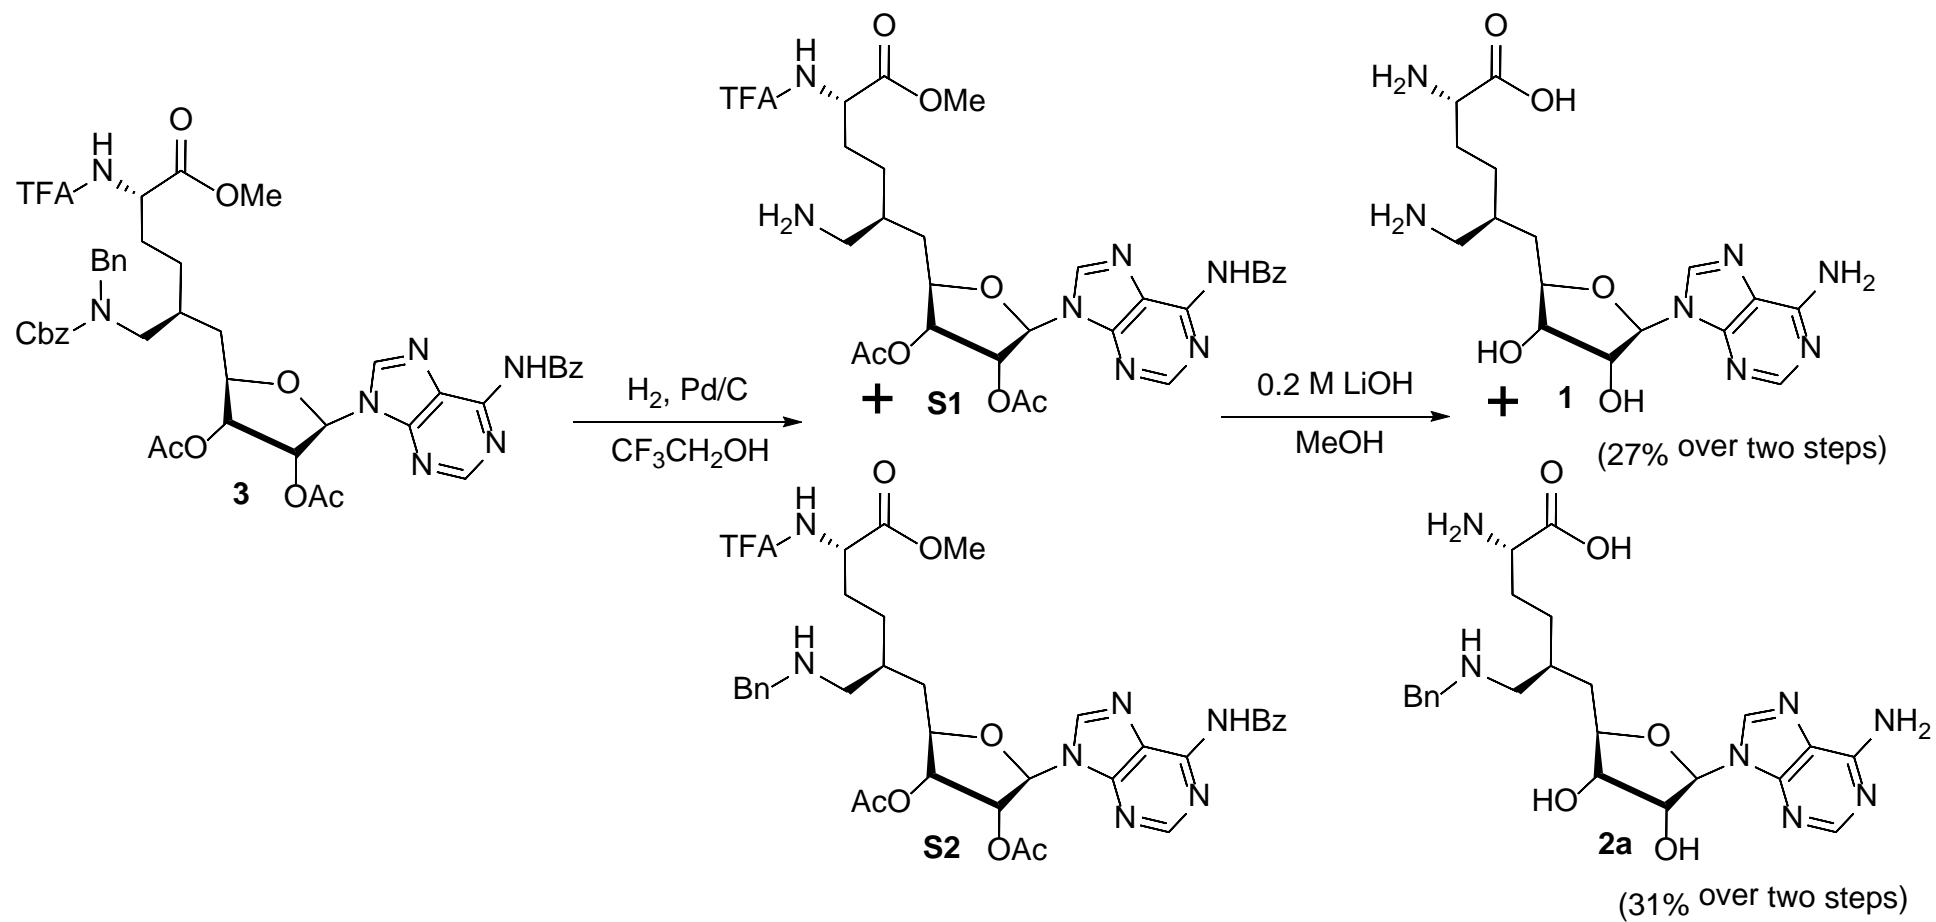

Supplement: supp [file elife_poa_e47110_Figure_1_figure_supplement_1.pdf › elife_poa_e47110_Figure_1_figure_supplement_1.pdf]

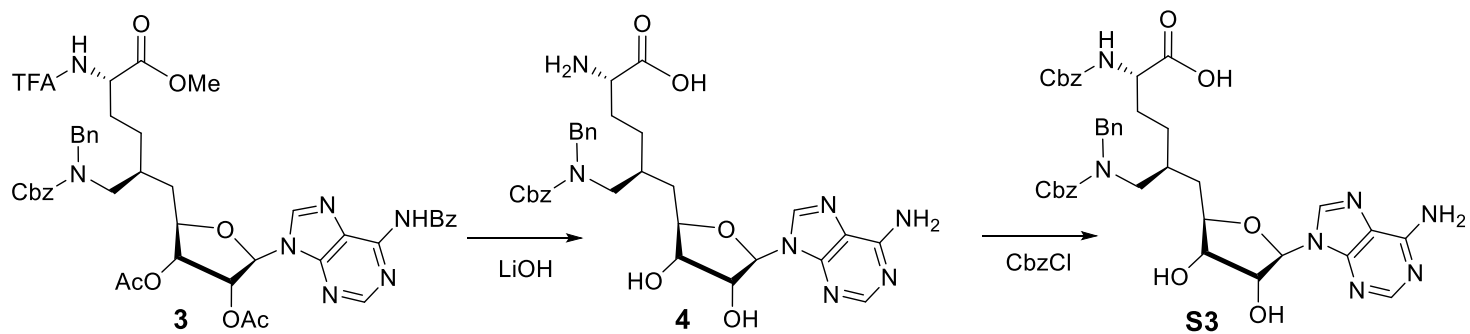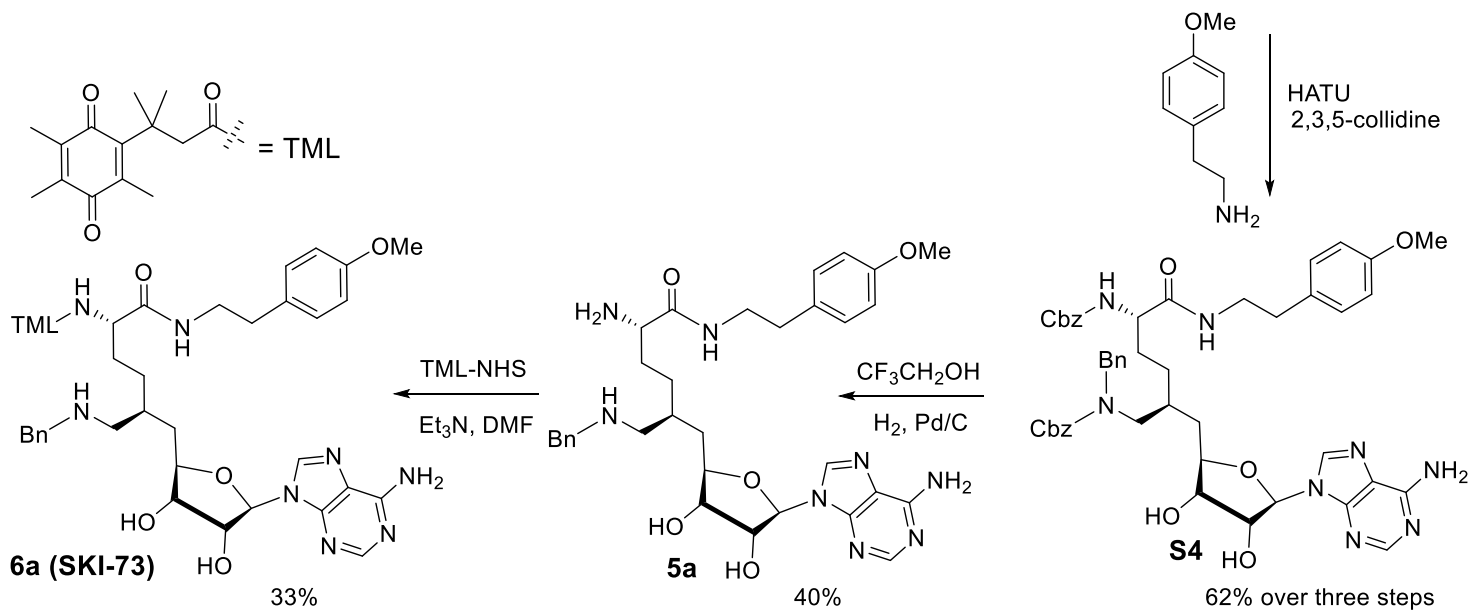

Supplement: supp [file elife_poa_e47110_Figure_1_figure_supplement_2.pdf › elife_poa_e47110_Figure_1_figure_supplement_2.pdf]

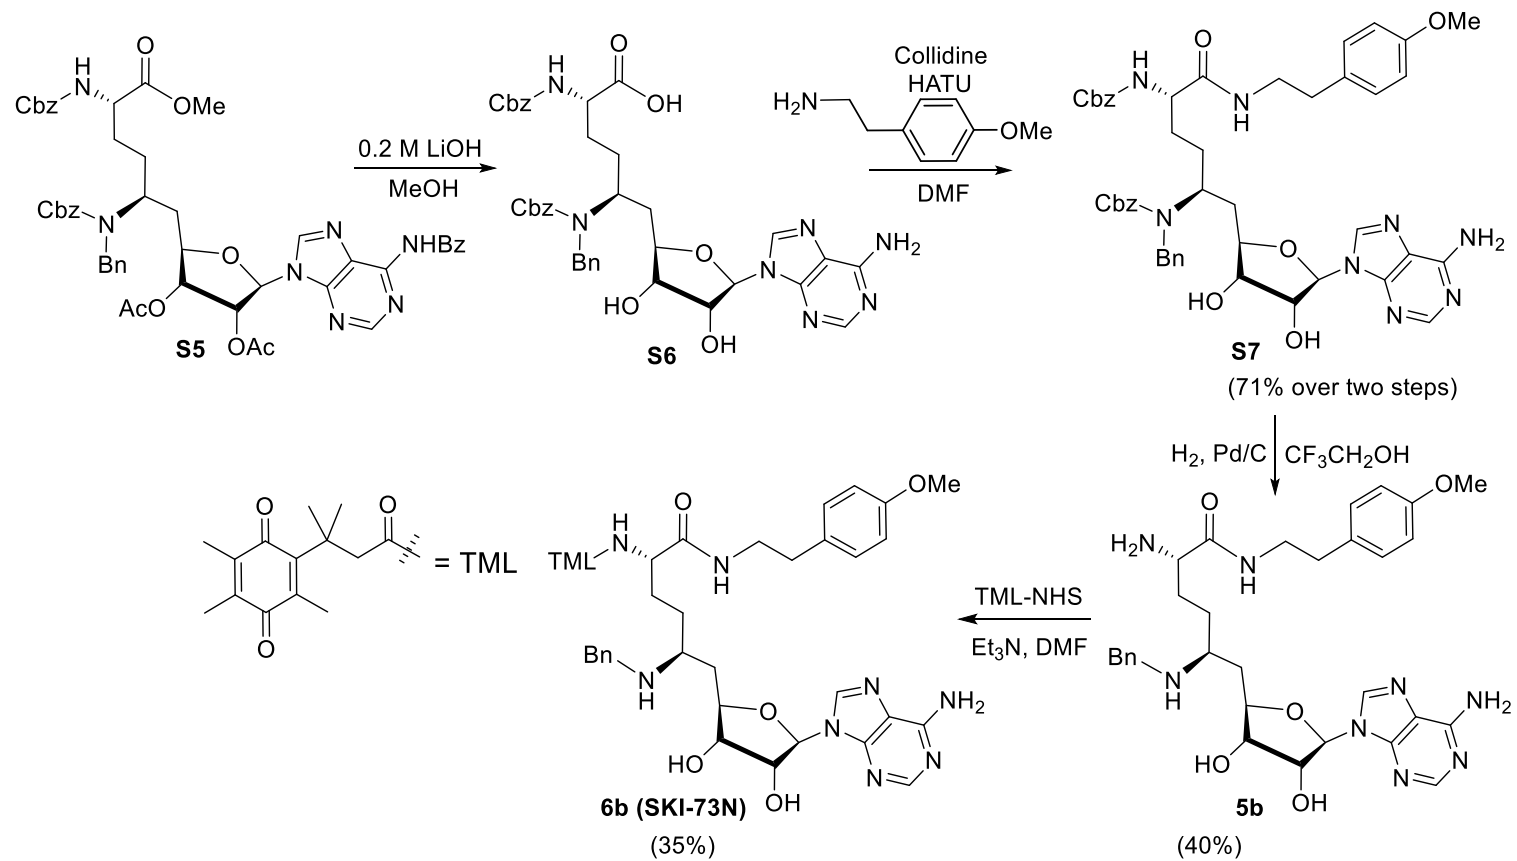

Supplement: supp [file elife_poa_e47110_Figure_1_figure_supplement_3.pdf › elife_poa_e47110_Figure_1_figure_supplement_3.pdf]

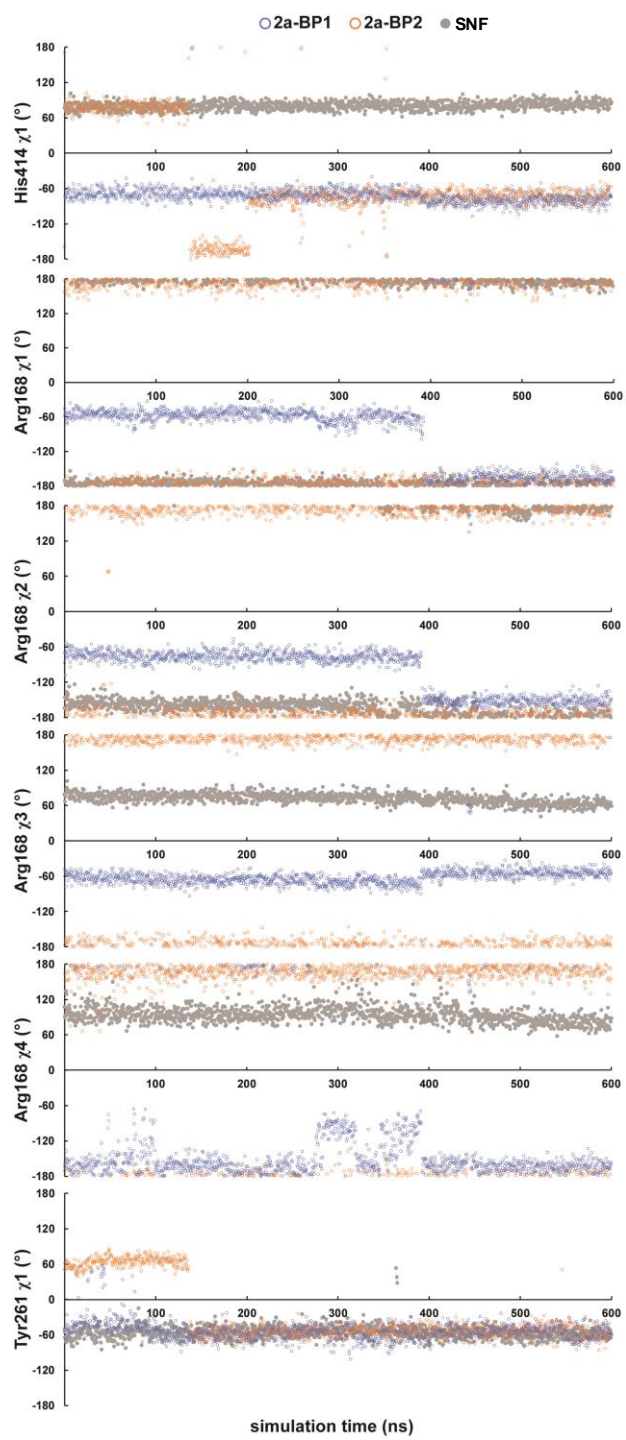

Supplement: supp [file elife_poa_e47110_Figure_3_figure_supplement_1.pdf › elife_poa_e47110_Figure_3_figure_supplement_1.pdf]

## 6'-Homosinefungin (HSF, 1)

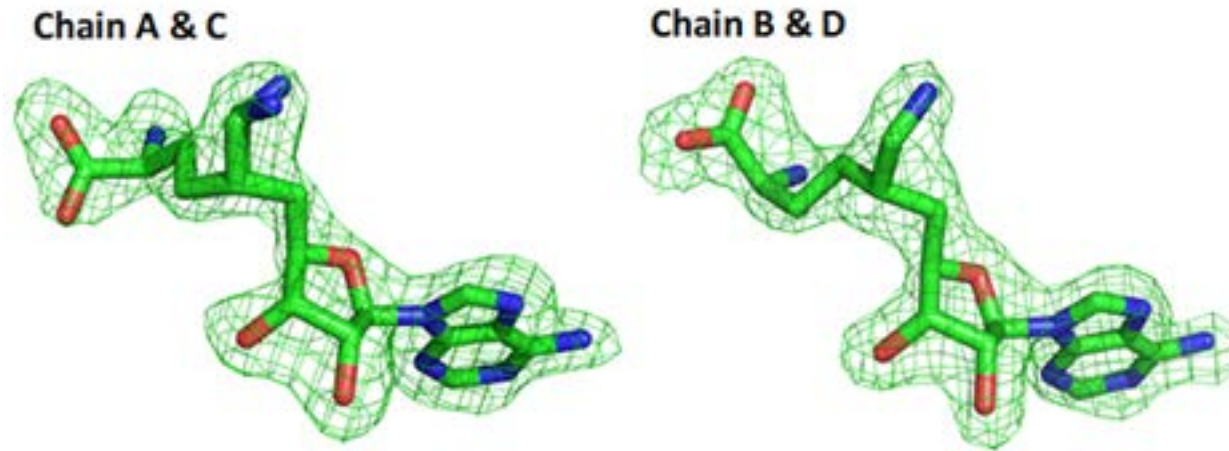

Supplement: supp [file elife_poa_e47110_Figure_4_figure_supplement_1.pdf › elife_poa_e47110_Figure_4_figure_supplement_1.pdf]

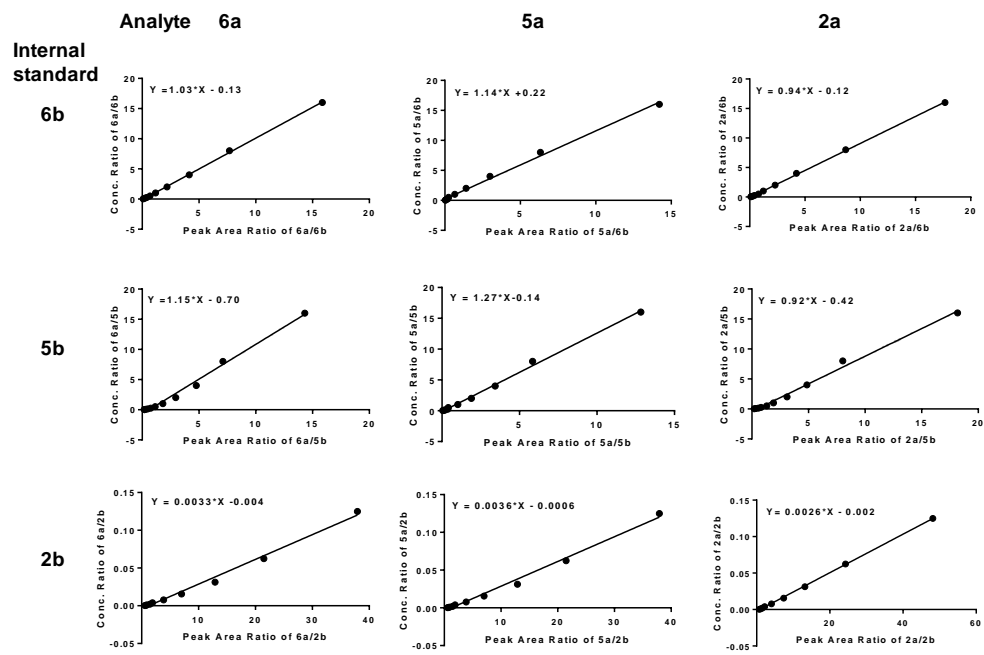

Supplement: supp [file elife_poa_e47110_Figure_5_figure_supplement_1.pdf › elife_poa_e47110_Figure_5_figure_supplement_1.pdf]

Internal  
standard

Analyte 6b

5b

2b

6a

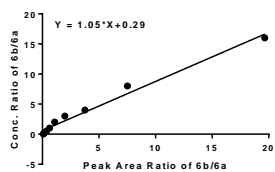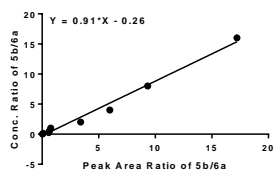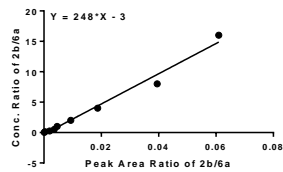

5a

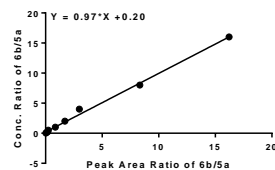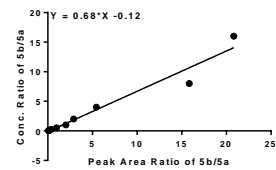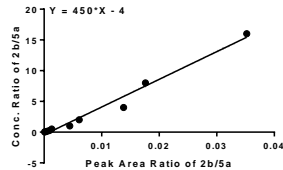

2a

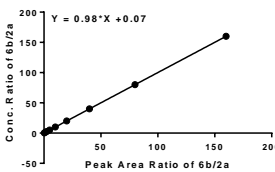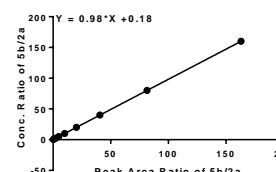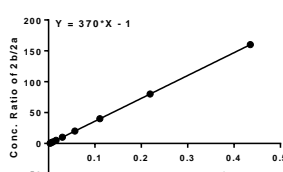

Supplement: supp [file elife_poa_e47110_Figure_5_figure_supplement_2.pdf › elife_poa_e47110_Figure_5_figure_supplement_2.pdf]

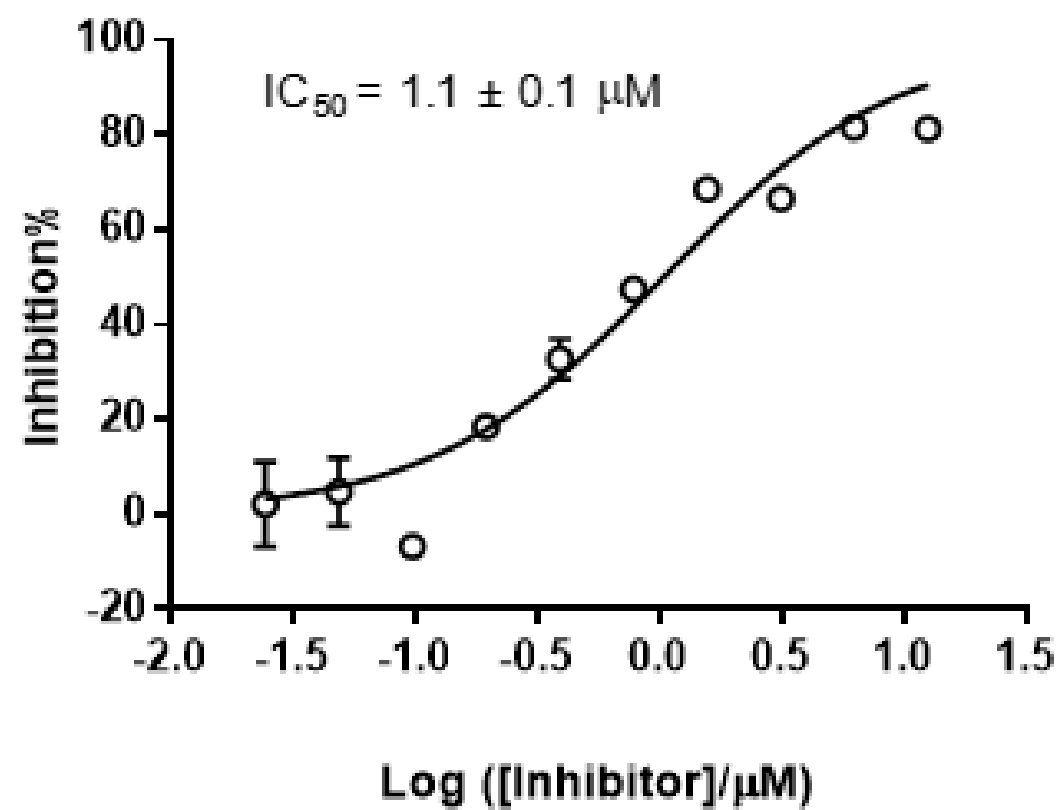

Supplement: supp [file elife_poa_e47110_Figure_5_figure_supplement_3.pdf › elife_poa_e47110_Figure_5_figure_supplement_3.pdf]

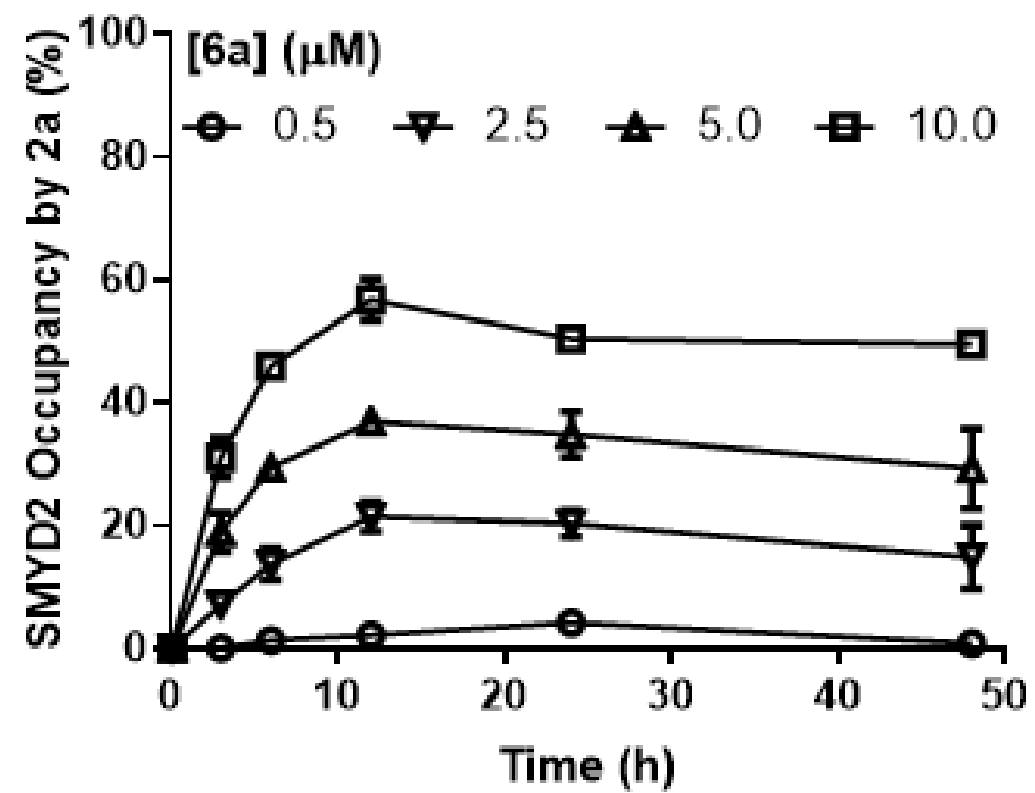

Supplement: supp [file elife_poa_e47110_Figure_5_figure_supplement_4.pdf › elife_poa_e47110_Figure_5_figure_supplement_4.pdf]

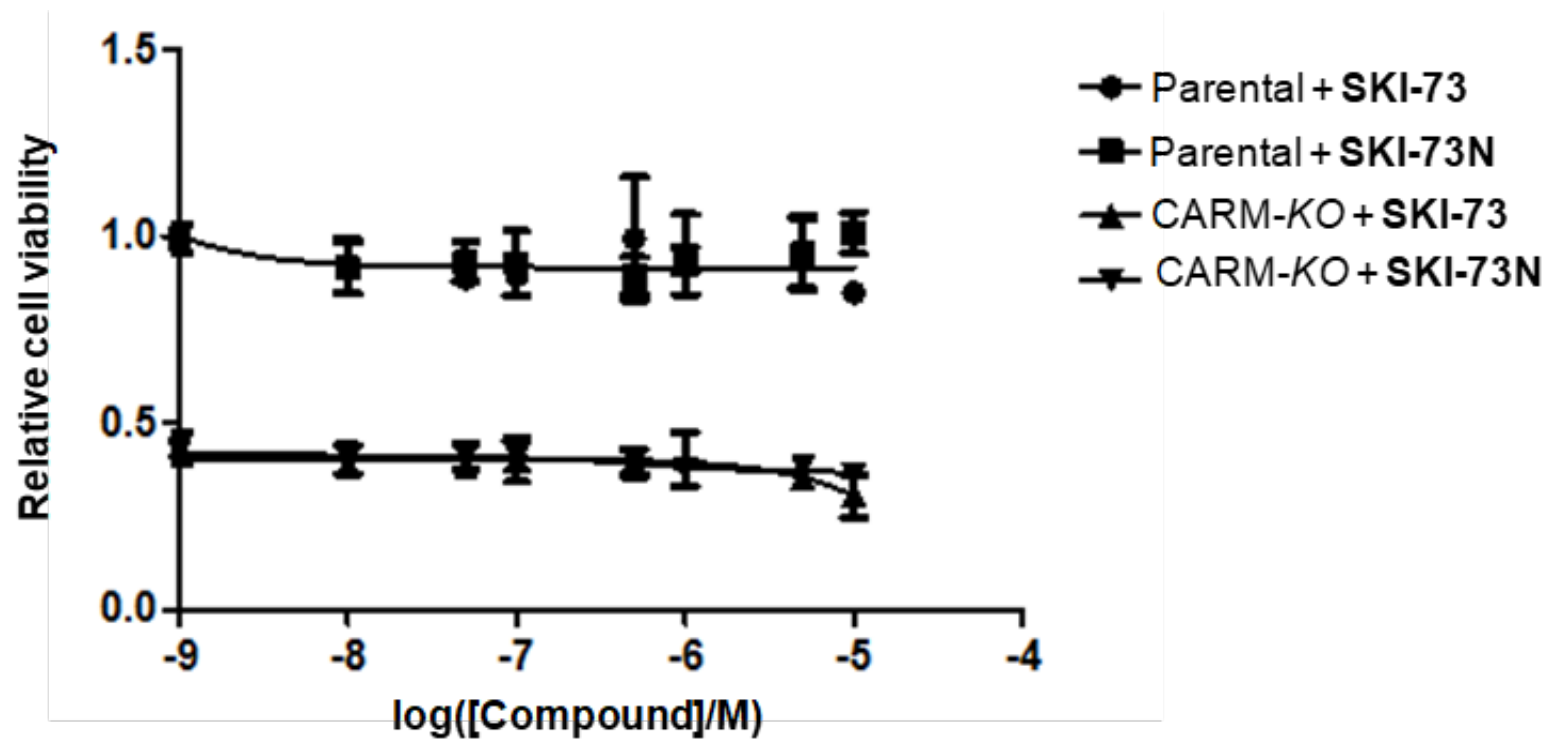

Supplement: supp [file elife_poa_e47110_Figure_6_figure_supplement_1.pdf › elife_poa_e47110_Figure_6_figure_supplement_1.pdf]

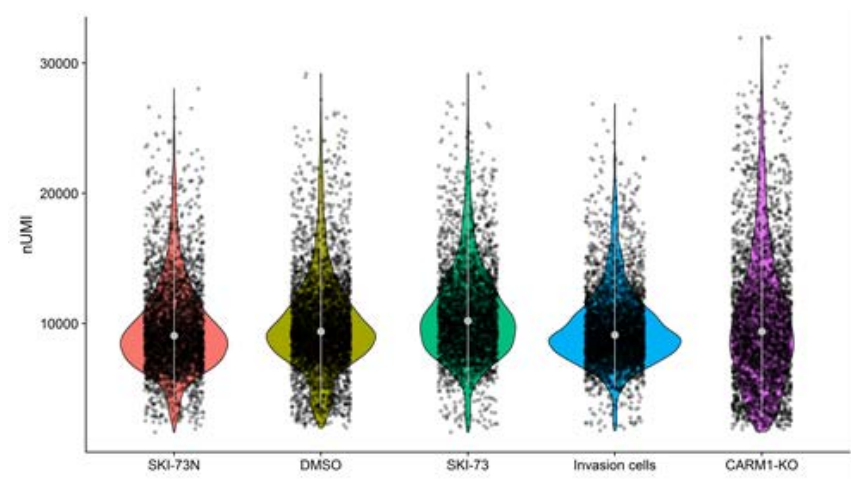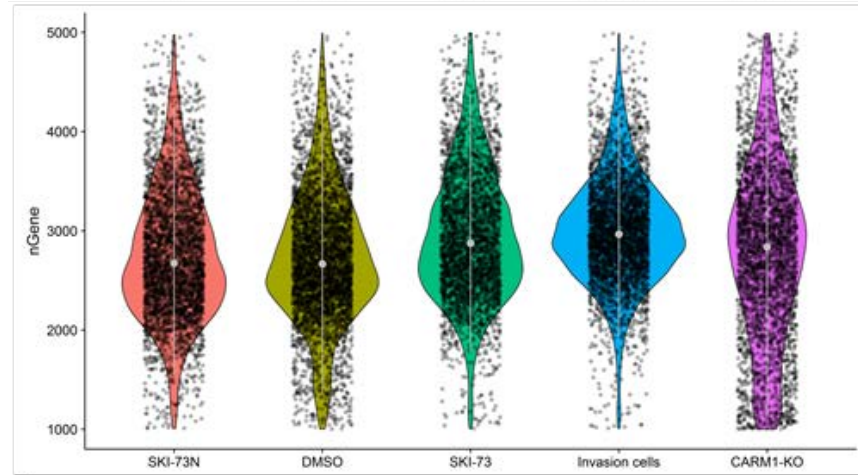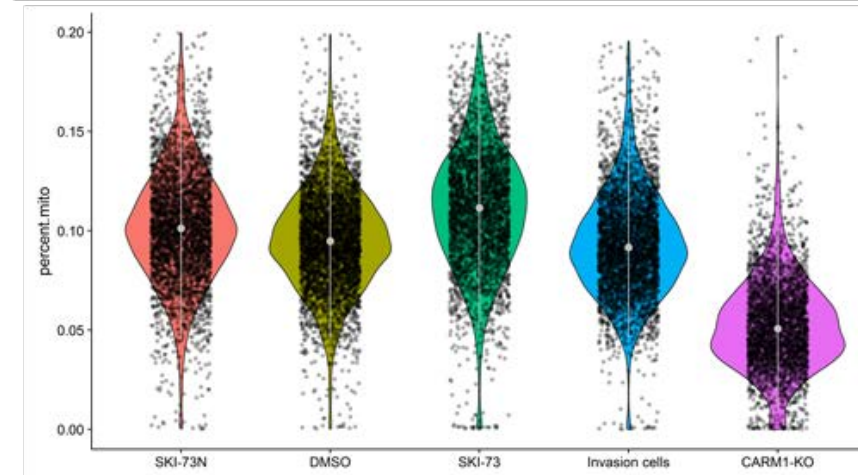

Supplement: supp [file elife_poa_e47110_Figure_7_figure_supplement_1.pdf › elife_poa_e47110_Figure_7_figure_supplement_1.pdf]

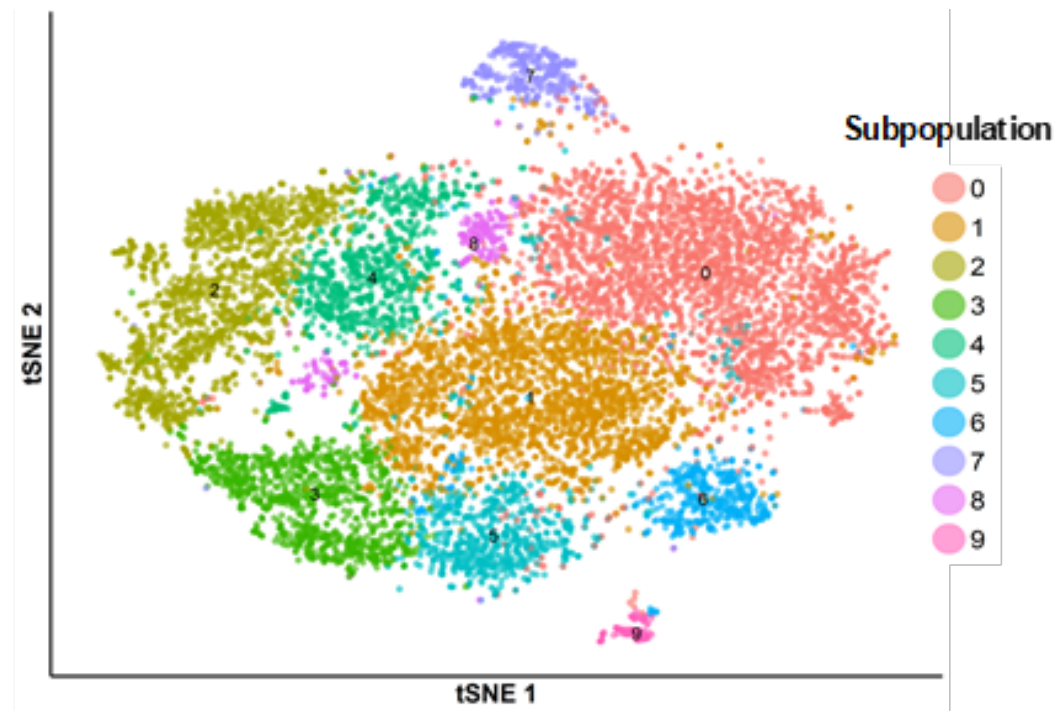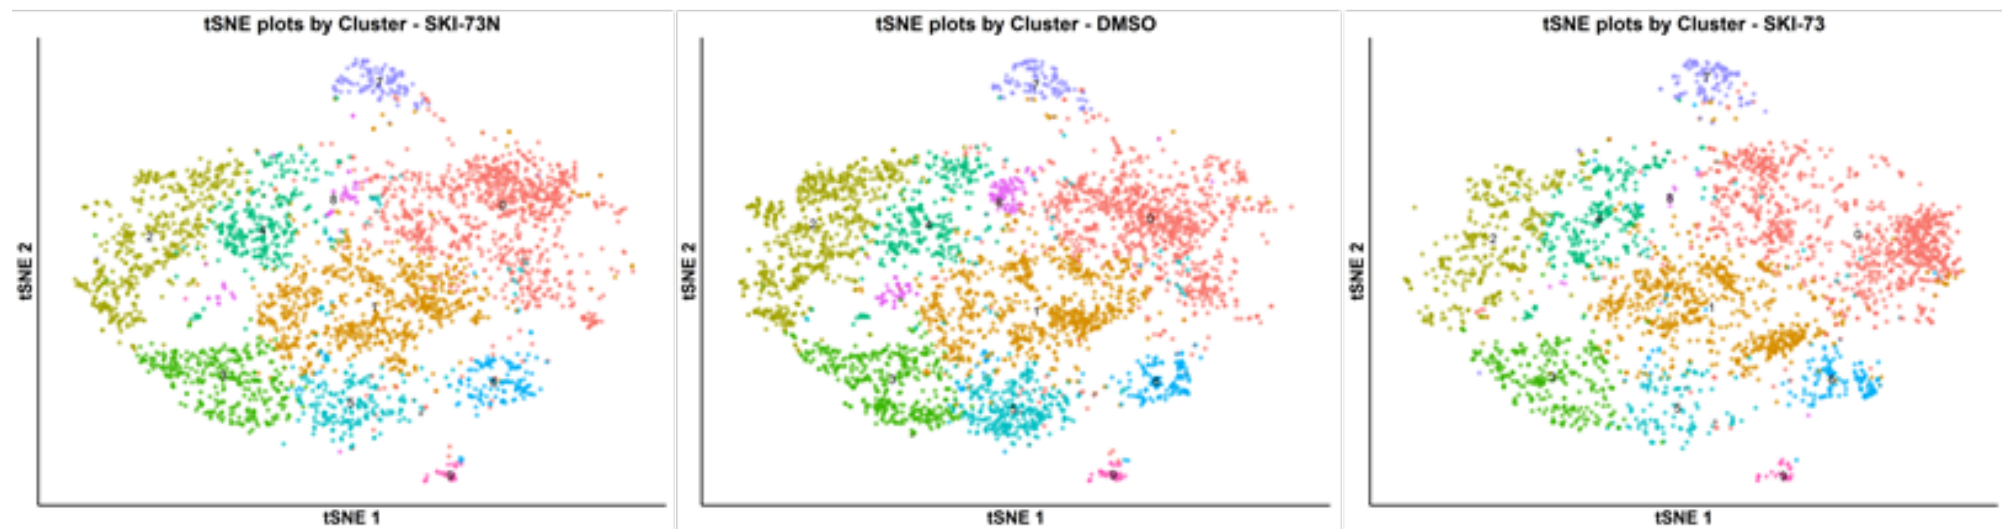

Supplement: supp [file elife_poa_e47110_Figure_7_figure_supplement_3.pdf › elife_poa_e47110_Figure_7_figure_supplement_3.pdf]

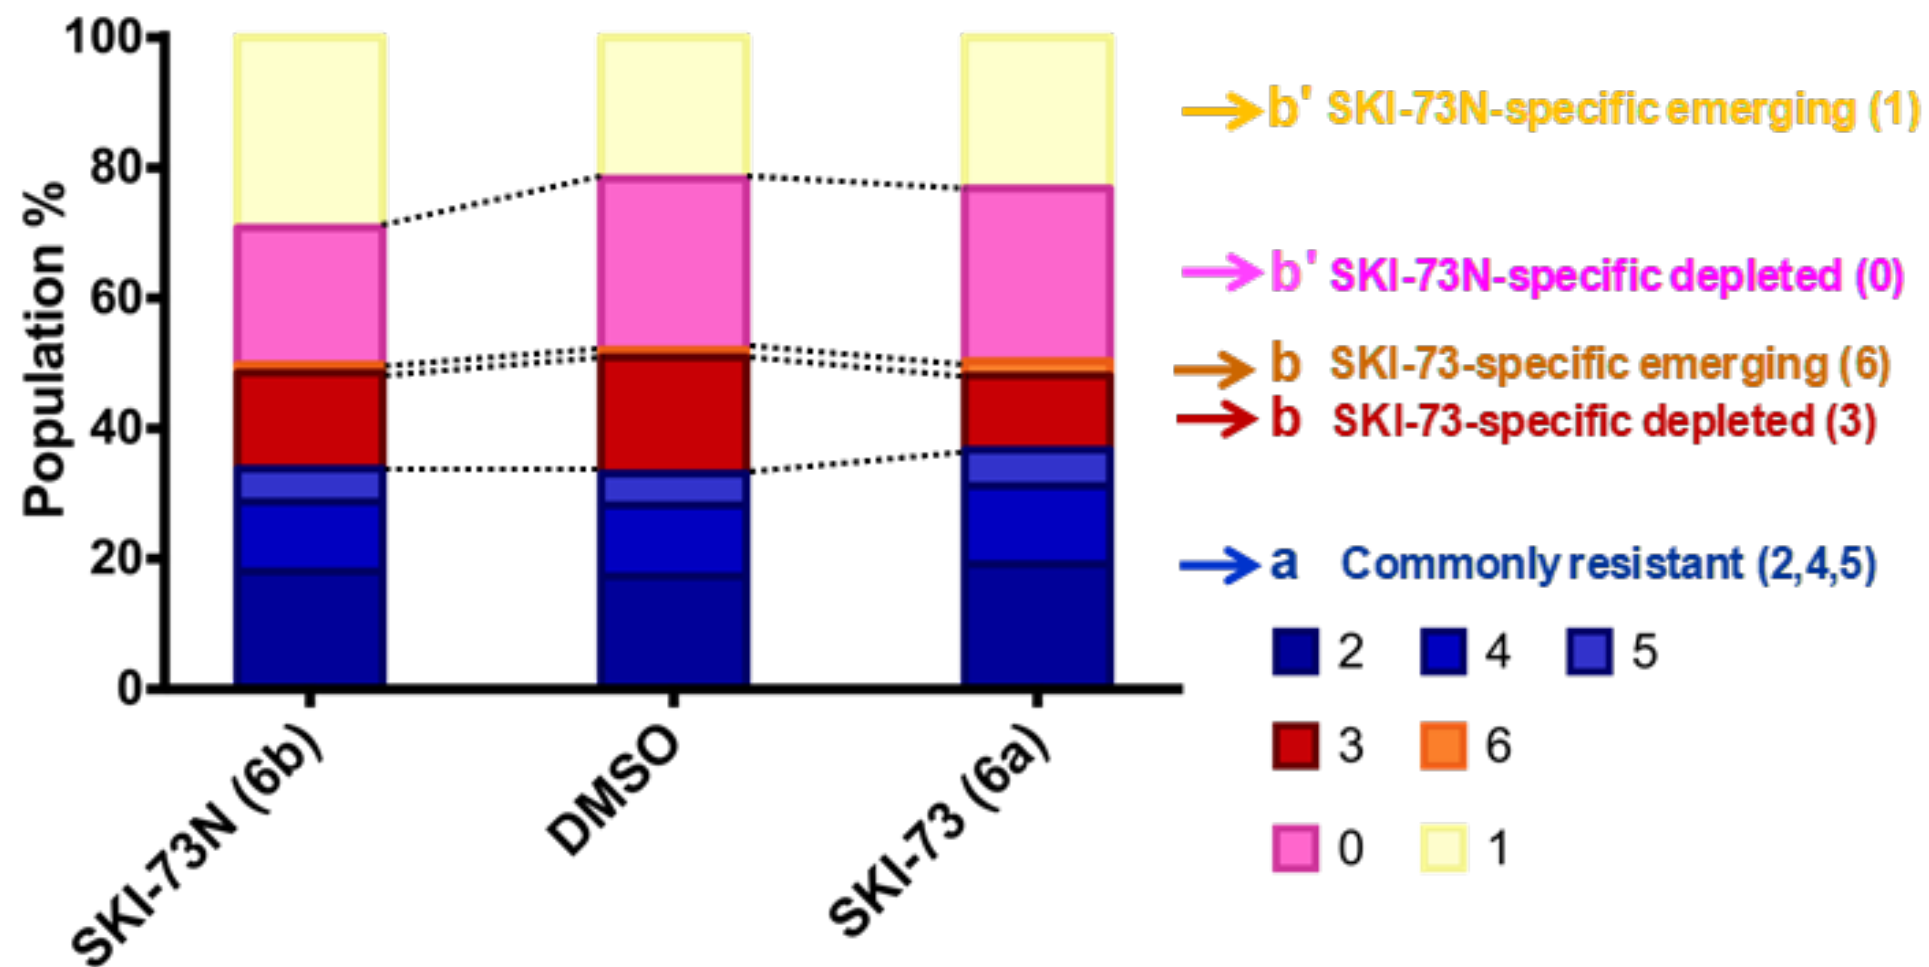

Supplement: supp [file elife_poa_e47110_Figure_7_figure_supplement_31.pdf › elife_poa_e47110_Figure_7_figure_supplement_31.pdf]

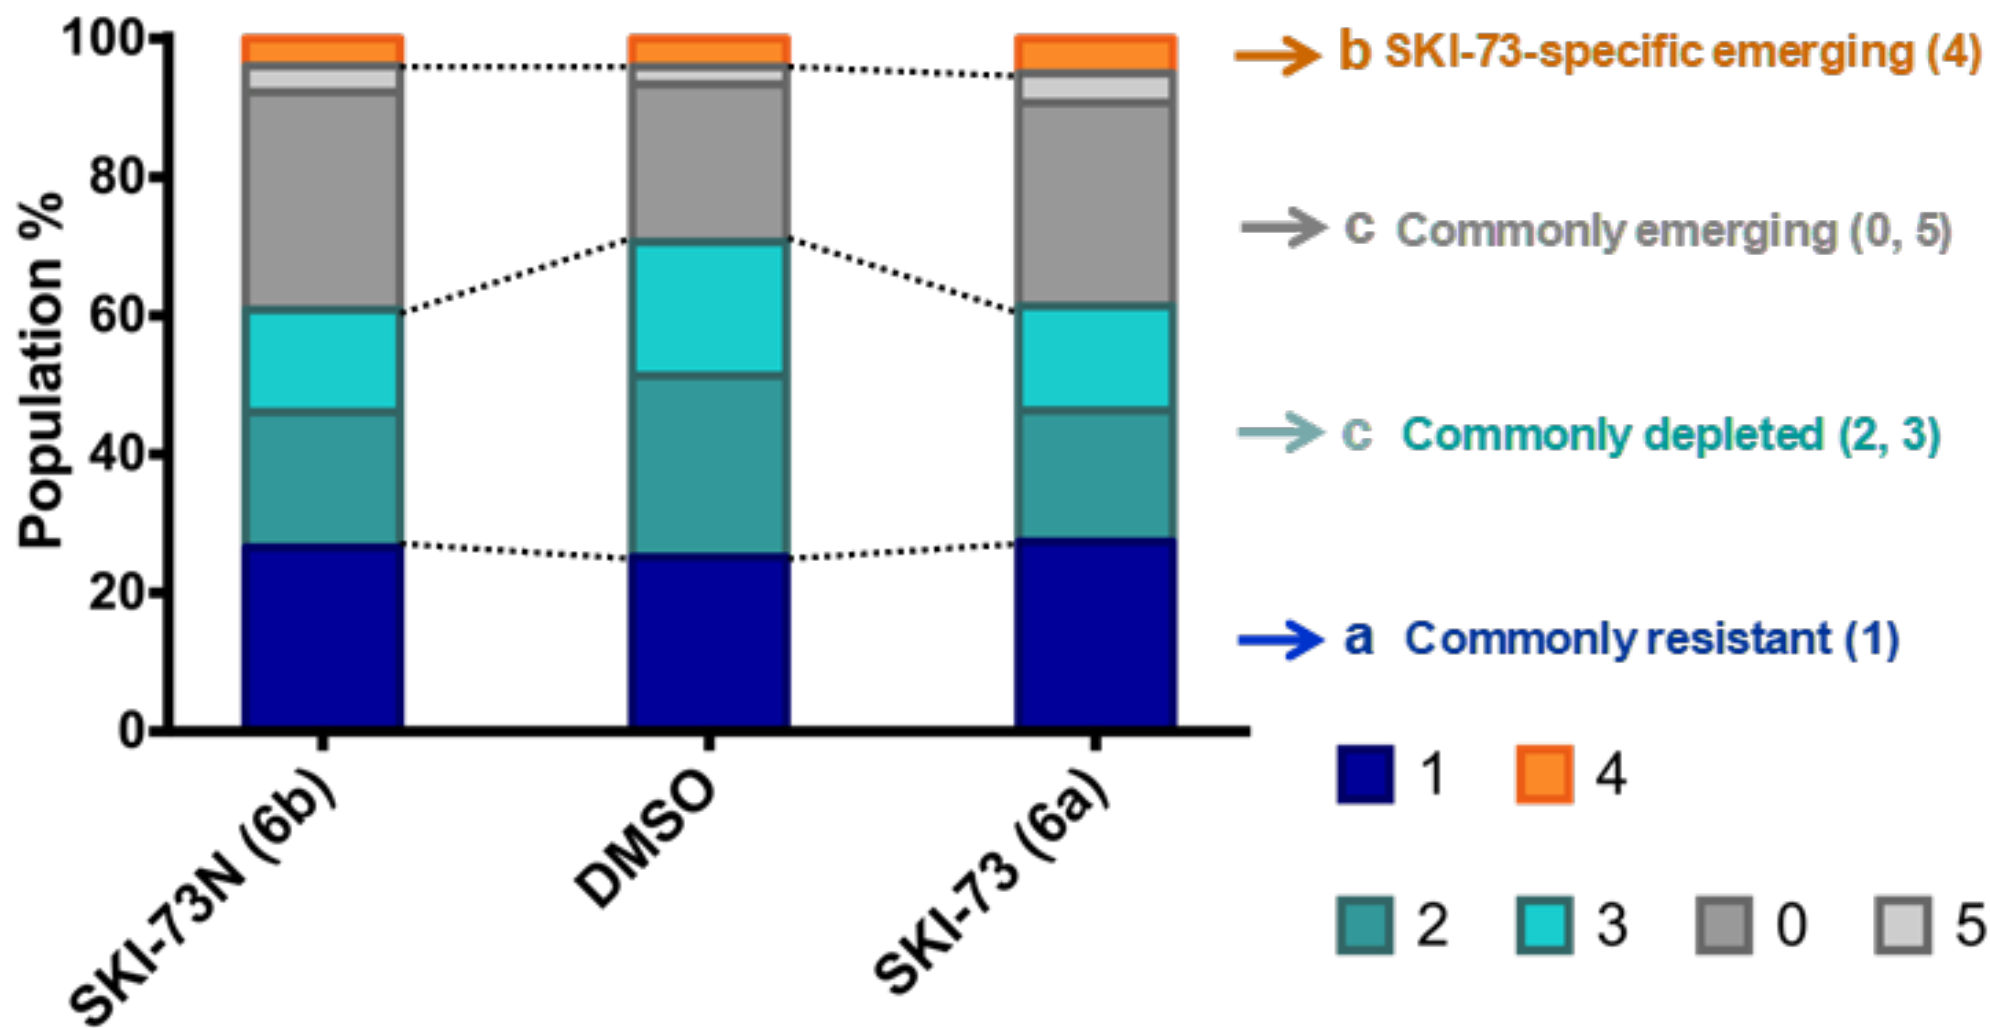

Supplement: supp [file elife_poa_e47110_Figure_7_figure_supplement_32.pdf › elife_poa_e47110_Figure_7_figure_supplement_32.pdf]

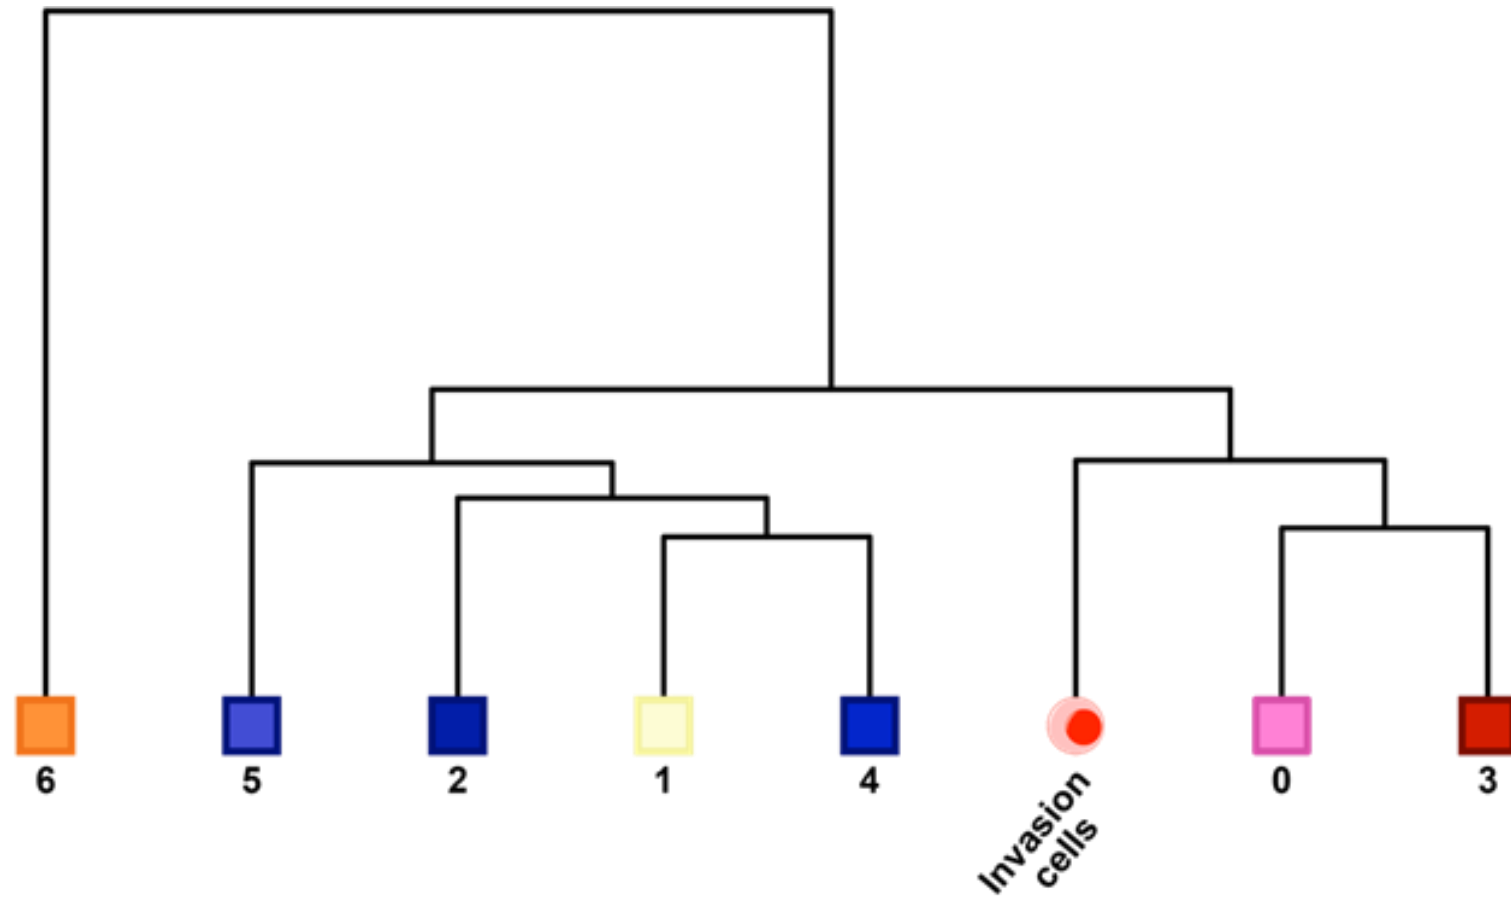

Supplement: supp [file elife_poa_e47110_Figure_7_figure_supplement_41.pdf › elife_poa_e47110_Figure_7_figure_supplement_41.pdf]

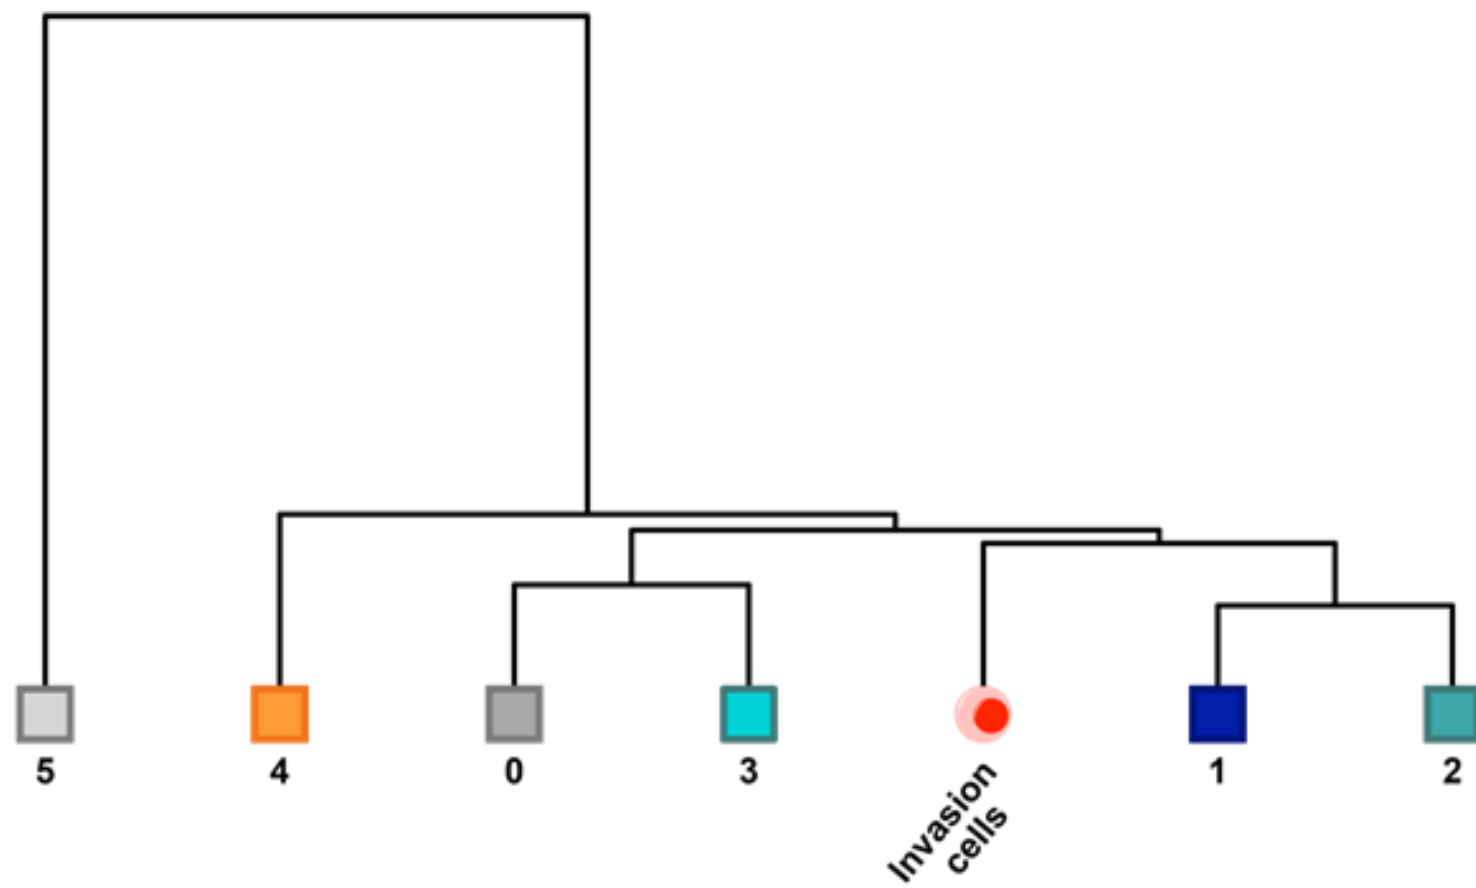

Supplement: supp [file elife_poa_e47110_Figure_7_figure_supplement_42.pdf › elife_poa_e47110_Figure_7_figure_supplement_42.pdf]

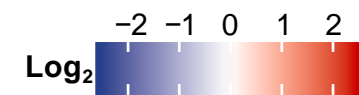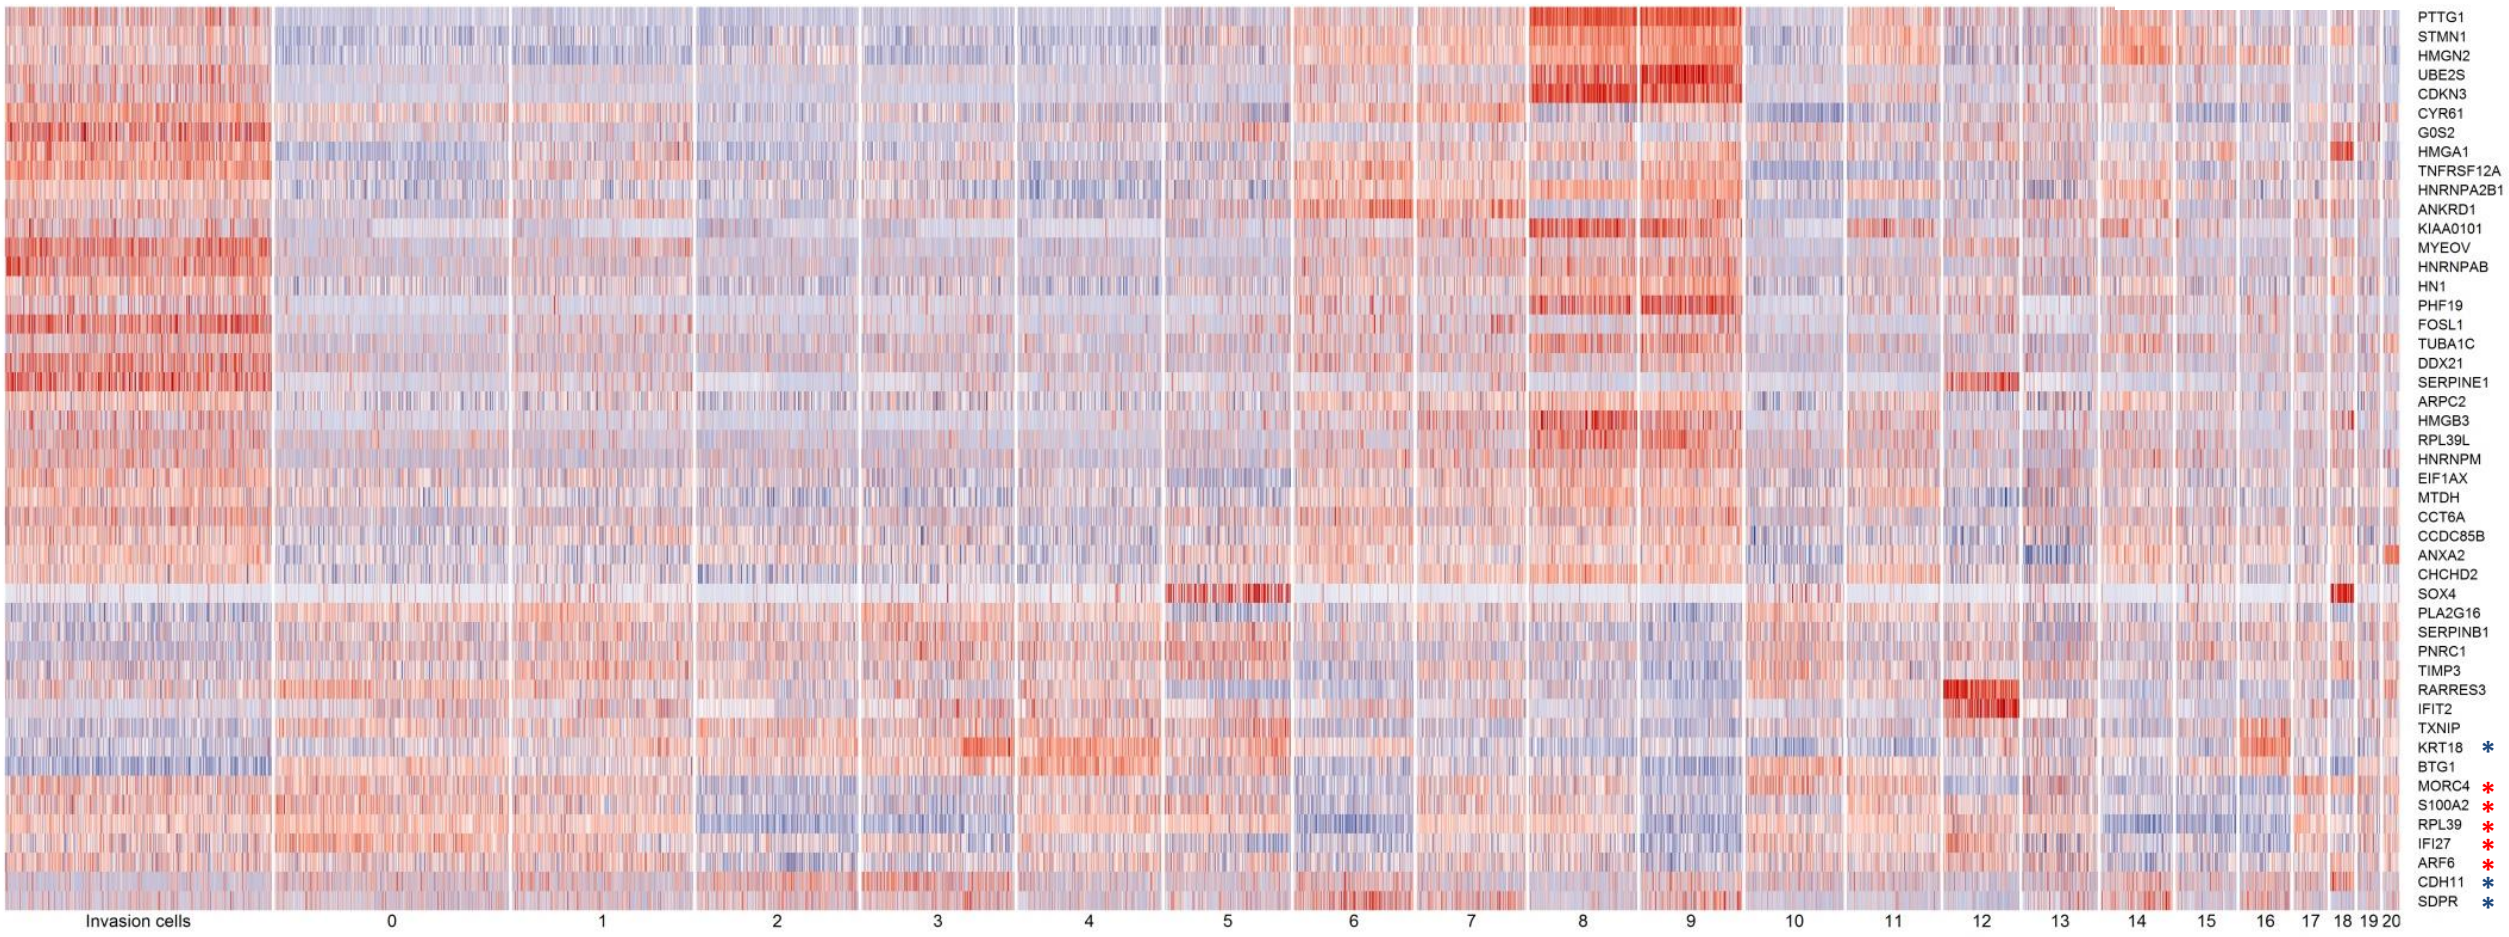

Supplement: supp [file elife_poa_e47110_Figure_7_figure_supplement_43.pdf › elife_poa_e47110_Figure_7_figure_supplement_43.pdf]
